1 The molecular mechanism of N-acetylglucosamine side-chain attachment to the  
2 Lancefield group A Carbohydrate in *Streptococcus pyogenes*.

3 **Jeffrey S. Rush<sup>a</sup>, Rebecca J. Edgar<sup>a</sup>, Pan Deng<sup>b</sup>, Jing Chen<sup>a</sup>, Haining Zhu<sup>a</sup>,**  
4 **Nina M. van Sorge<sup>c</sup>, Andrew J. Morris<sup>b</sup>, Konstantin V. Korotkov<sup>a</sup>, and Natalia**  
5 **Korotkova<sup>a#</sup>**

6 Department of Molecular and Cellular Biochemistry, University of Kentucky,  
7 Lexington, Kentucky, USA<sup>a</sup>; Division of Cardiovascular Medicine and the Gill Heart  
8 Institute, University of Kentucky Lexington, Kentucky, USA<sup>b</sup>; Department of Medical  
9 Microbiology, University Medical Center Utrecht, Utrecht, The Netherlands<sup>c</sup>.

10 #Address correspondence to Natalia Korotkova, [nkorotkova@uky.edu](mailto:nkorotkova@uky.edu)

11

12 Running Head: Mechanism of cell wall modification with GlcNAc in GAS

13 The word count for the abstract: 196

14 The word count for the text: 12387

15       **Abstract**

16       *Streptococcus pyogenes* or Group A *Streptococcus* (GAS) causes numerous diseases  
17 in humans, ranging from minor skin and throat infections, to life-threatening systemic  
18 conditions such as bacteremia, necrotizing fasciitis, and toxic-shock syndrome. GAS  
19 synthesizes a key antigenic surface polymer — the Lancefield group A Carbohydrate  
20 (GAC). GAC is attached to peptidoglycan and consists of a polyrhamnose polymer, with  
21 N-acetylglucosamine (GlcNAc) side chains, that is an essential virulence determinant.  
22 The molecular details of the mechanism of polyrhamnose modification with GlcNAc are  
23 currently unknown. In this report we demonstrate that GAC biosynthesis requires two  
24 distinct undecaprenol-linked GlcNAc-lipid intermediates: GlcNAc-pyrophosphoryl-  
25 undecaprenol (GlcNAc-P-P-Und) produced by GacO and GlcNAc-phosphate-  
26 undecaprenol (GlcNAc-P-Und) produced by GacI. The GAC polyrhamnose backbone is  
27 assembled on GlcNAc-P-P-Und. Furthermore, our data suggests that GlcNAc-P-Und is  
28 used by the membrane glycosyltransferase GacL to transfer GlcNAc from GlcNAc-P-  
29 Und to the polyrhamnose polysaccharide. In addition, GacJ, a small membrane protein,  
30 forms a complex with GacI and significantly stimulates its catalytic activity. We show  
31 that GlcNAc modification of polyrhamnose protects GAS from amidase-induced lysis.  
32 Thus, our study significantly expands our understanding of the biosynthesis of GAS cell  
33 wall polysaccharide and points to the functional importance of polysaccharide  
34 modifications in protection of peptidoglycan from lytic enzymes.

35       **IMPORTANCE**

36       In many species of Lactobacillales peptidoglycan is decorated by polyrhamnose  
37 polysaccharides that are critical for cell envelope integrity and cell shape and represent  
38 key antigenic determinants. Despite the biological importance of these polysaccharides,  
39 their biosynthetic pathways have received limited study. The important human  
40 pathogen, *Streptococcus pyogenes*, synthesizes a cell wall-associated polyrhamnose  
41 polysaccharide with N-acetylglucosamine (GlcNAc) side chains. The GlcNAc side chain  
42 is an important virulence determinant used by bacteria to evade the host innate immune  
43 defense. Here we identify the molecular mechanism of polyrhamnose modification with  
44 GlcNAc in *S. pyogenes*. We show that GacI synthesizes GlcNAc-phosphate-  
45 undecaprenol (GlcNAc-P-Und) aided by GacJ. GlcNAc-P-Und is apparently used by

46 GacL to transfer GlcNAc to polyrrhamnose. We demonstrate that GacI homologs  
47 perform a similar function in *Streptococcus agalactiae* and *Enterococcus faecalis*. Thus,  
48 the elucidation of polysaccharide biosynthesis in *S. pyogenes* enhances our  
49 understanding of how other Gram-positive bacteria produce essential components of  
50 their cell wall.

51

## 52 INTRODUCTION

53 The cytoplasmic membrane of Gram-positive bacteria is surrounded by a thick cell  
54 wall consisting of multiple peptidoglycan layers decorated with proteins and a variety of  
55 carbohydrate-based polymers. Rhamnose (Rha) is the main component of the  
56 carbohydrate structures in many species of the Lactobacillales order (1). These  
57 polymers play essential roles in maintaining and protecting bacterial cell envelopes and  
58 in pathogenesis of infections caused by *Streptococcus pyogenes* and *Enterococcus*  
59 *faecalis* (1). It is of paramount importance to understand the molecular mechanisms of  
60 Rha-containing cell wall polysaccharide biosynthesis for developing novel therapeutics  
61 against these bacterial pathogens.

62 *S. pyogenes* or Group A *Streptococcus* (GAS) is associated with numerous  
63 diseases in humans ranging from minor skin and throat infections such as impetigo and  
64 pharyngitis to life-threatening invasive infections such as streptococcal toxic syndrome  
65 and necrotizing fasciitis (2). The main component of GAS cell wall is the Lancefield  
66 group A Carbohydrate (GAC) that comprises about 40-60% of the total cell wall mass  
67 (3). Serological grouping of beta-hemolytic streptococci (A, B, C, E, F, and G groups),  
68 introduced by Rebecca Lancefield in 1933, is based on the detection of carbohydrate  
69 antigens present on the cell wall (4). GAC is presumably covalently linked to N-  
70 acetylmuramic acid (MurNAc) of peptidoglycan, although the molecular structure of the  
71 linkage unit has not been established (5). All serotypes of GAS produce GAC consisting  
72 of a polyrrhamnose backbone with N-acetylglucosamine (GlcNAc) side chains (6, 7). The  
73 average molecular mass of GAC has been reported to be  $8.9 \pm 1.0$  kDa, corresponding  
74 to an average of 18 repeating units of  $[\rightarrow 3)\alpha\text{-Rha}(1\rightarrow 2)[\beta\text{-GlcNAc}(1\rightarrow 3)]\alpha\text{-Rha}(1\rightarrow)$  (8).  
75 Since Rha is absent in mammalian cells, GAC is an attractive candidate for a universal  
76 GAS vaccine (8, 9). Moreover, the GlcNAc side chains are an important virulence

77 determinant in GAS (5). GAS mutants lacking GlcNAc are susceptible to innate immune  
78 clearance by neutrophils and antimicrobial agents, and are significantly attenuated in  
79 animal models of GAS infection (5).

80 Similar to the biosynthesis of other cell-envelope polymers — peptidoglycan,  
81 lipopolysaccharide, wall teichoic acid (WTA), and capsular polysaccharide — the  
82 synthesis of Rha-containing carbohydrate structures is likely initiated on the inside of  
83 the cytoplasmic membrane and proceeds through several steps including the  
84 attachment of the first sugar residue to a lipid carrier, undecaprenyl phosphate (Und-P),  
85 followed by elongation of the polysaccharide through stepwise addition of activated  
86 sugar residues to the lipid carrier (1). After translocation of the polysaccharide across  
87 the membrane and further modifications, it is presumably attached to peptidoglycan via  
88 a phosphate ester linkage (1). The first membrane step of O-antigen biosynthesis in  
89 enterobacteria and WTA biosynthesis in *Bacillus subtilis* and *Staphylococcus aureus*  
90 (10) is catalyzed by the UDP-GlcNAc:Und-P GlcNAc-1-phosphate transferase encoded  
91 by *WecA* homologs (11, 12). *WecA* transfers GlcNAc-phosphate from UDP-GlcNAc to  
92 Und-P, forming GlcNAc-pyrophosphoryl-undecaprenol (GlcNAc-P-P-Und). Although  
93 GAS strains do not produce WTA, all GAS genomes contain a *wecA* homolog, *gacO*  
94 (5). Significantly, GAC biosynthesis is sensitive to tunicamycin, a known inhibitor of  
95 *WecA* (5) and the *Streptococcus mutans* *GacO* homolog, *RgpG*, has been shown to  
96 complement *WecA* activity in *E. coli* (13). These observations support an essential role  
97 for *GacO* in the biosynthesis of GlcNAc-P-P-Und and suggest GlcNAc-P-P-Und may  
98 function as a lipid-anchor in the initiation of GAC biosynthesis.

99 Other genes required for GAC biosynthesis and transport are found in a separate  
100 location on the GAS chromosome and comprise a 12-gene locus (*gacA-gacL*) (Fig.1A).  
101 The first three genes, *gacA-gacC* together with *gacG*, are conserved in many species of  
102 the Lactobacillales order (1). *GacA* encodes a dTDP-4-dehydrorhamnose reductase,  
103 the enzyme responsible for dTDP-rhamnose biosynthesis (14). *GacB*, *gacC*, and *gacG*  
104 encode putative cytoplasmic rhamnosyltransferases. In *S. mutans* homologous genes  
105 *rgpA*, *rgpB* and *rgpF* are involved in rhamnan backbone biosynthesis (15). In GAS,  
106 *gacA-gacC* are essential for viability and cannot be deleted (5). However, deletion  
107 mutants have been obtained in other genes of the GAC gene cluster (5). It has been

108 shown that *gacI*, *gacJ* and *gacK* are non-essential for viability, but are required for  
109 GlcNAc side-chain addition to the polyrhamnose (5). They encode a putative  
110 cytoplasmic glycosyltransferase, a small membrane protein and a protein with homology  
111 to the Wzx family of membrane proteins involved in the export of O-antigen and teichoic  
112 acids, respectively. In contrast, inactivation of *gacD*, *gacE*, *gacF*, *gacG*, *gacH* or *gacL*  
113 has no effect on GAS viability and the GAC produced by these mutants is reported to  
114 display a wild type (WT) antigenic profile, indicating the presence of the  
115 immunodominant GlcNAc side chains (5). *GacD* and *gacE* encode the components of  
116 an ABC transport system. In *S. mutans* the *gacD* and *gacE* homologs are responsible  
117 for rhamnan polysaccharide transport (15). *GacF*, *gacH* and *gacL* encode a cytosolic  
118 glycosyltransferase, a putative membrane-associated glycerol phosphate transferase  
119 and a membrane-associated glycosyltransferase, respectively.

120 In this study we address the molecular mechanism of GlcNAc attachment to  
121 polyrhamnose. We demonstrate that *GacI* catalyzes formation of GlcNAc-P-Und, and  
122 *GacJ* stimulates the catalytic activity of *GacI*. Subsequently *GacL* transfers GlcNAc from  
123 GlcNAc-P-Und to the polyrhamnose backbone of GAS polysaccharide. Moreover, we  
124 confirm *GacO* function in GlcNAc-P-P-Und formation and demonstrate the role of this  
125 GlcNAc-lipid in initiation of polyrhamnose biosynthesis.

126

## 127 RESULTS

128 **GacL is required for GlcNAc attachment to polyrhamnose.** *GacL*, a polytopic (12–  
129 13 transmembrane segments) membrane protein, is reported to be dispensable for  
130 GlcNAc attachment to polyrhamnose (5). To investigate the function of *GacL* in GAC  
131 biogenesis, we disrupted *gacL* in the hyperinvasive *S. pyogenes* M1T1 serotype strain,  
132 MGAS5005 (16), creating the 5005 $\Delta$ *gacL* mutant. In agreement with published data (5)  
133 5005 $\Delta$ *gacL* did not display any detectable growth phenotype in comparison to the WT  
134 strain. Surprisingly, we found that 5005 $\Delta$ *gacL* cells failed to bind GlcNAc-specific anti-  
135 GAC antibodies, suggesting a loss of the GlcNAc antigenic epitope (Fig. 1B). The  
136 5005 $\Delta$ *gacL* phenotype was restored by expressing the WT copy of *gacL* on the mutant  
137 chromosome (Fig. 1B). To confirm that 5005 $\Delta$ *gacL* cells are deficient in GlcNAc addition  
138 to polysaccharide, we measured the binding of fluorescently labeled succinylated wheat

139 germ agglutinin (sWGA), a lectin that specifically binds non-reducing terminal  $\beta$ -GlcNAc  
140 residues, to WT and 5005 $\Delta$ *gacL* cells. Deletion of *gacL* led to a significant decrease in  
141 binding of WGA to the 5005 $\Delta$ *gacL* strain as compared with the WT (Fig. 1C), indicating  
142 that the mutant has substantially less GlcNAc-containing saccharides on the cell  
143 surface. Furthermore, direct compositional analysis of cell wall purified from WT and  
144 5005 $\Delta$ *gacL* cells confirmed a significant decrease of GlcNAc content in the 5005 $\Delta$ *gacL*  
145 cell wall sample (Fig. 1D, E and F). These data strongly support a role for GacL in  
146 GlcNAc side-chain attachment to polyrhamnose.

147 **A *gacL* deletion mutant accumulates GlcNAc-P-Und.** To investigate further  
148 the effect of GacL deletion in *S. pyogenes*, we isolated the phospholipid fractions from  
149 the membranes of WT and 5005 $\Delta$ *gacL* cells. TLC analysis revealed accumulation of a  
150 previously unidentified phosphoglycolipid in 5005 $\Delta$ *gacL* (Fig. 2A). The novel lipid was  
151 found to be stable to mild alkaline methanolysis, but sensitive to mild acid (0.1 N HCl,  
152 50 °C, 50% isopropanol) and reacted with orcinol spray (17), Dittmer-Lester  
153 phospholipid spray reagent (18) and with anisaldehyde, an isoprenol-specific reagent  
154 (19), consistent with its tentative identification as a glycoposphoprenol (data not  
155 shown). High-resolution negative ion ESI-MS analysis of the purified lipid identified a  
156 molecular ion  $[M-H]^{-1}$  of  $M/z = 1048.73621$  (Fig. 2B). In addition, prominent high-  
157 resolution fragment ions characteristic of  $PO_3$ ,  $H_2PO_4$ , N-acetyl hexosamine-phosphate  
158 and Und-P were also found (Table 1). These data are consistent with a glycolipid  
159 comprised of N-acetyl hexosamine-phosphate-undecaprenol. In experiments described  
160 in detail below, we found that when membrane fractions from GAS are incubated with  
161 UDP- $[^3H]$ GlcNAc, a  $[^3H]$ GlcNAc-lipid which co-chromatographs on TLC with this novel  
162 lipid is rapidly formed. Importantly, the product ion spectra shown in Figure 2B does not  
163 contain a fragment ion containing  $[Und-PO_4-C_2H_2NHCOCH_3]^{-}$  ( $M/z=929.7$ ), arising from  
164 a cross-ring fragmentation reaction, suggesting that the hydroxyl of the anomeric carbon  
165 and the nitrogen at the 2-position of the glycosyl ring are *trans* to the plane of the ring  
166 (20, 21). This observation strongly suggests that the anomeric hydroxyl is present in the  
167  $\beta$  configuration. Furthermore, isolated  $[^3H]$ GlcNAc-P-Und phospholipid (described in  
168 detail below) is extremely sensitive to incubation with 50% phenol at 68 °C — a property  
169 that is consistent with  $\beta$ -GlcNAc-P-Und (22) (Table S4). Taken together, these data

170 identify the novel glycolipid accumulating in the 5005 $\Delta$ *gacL* strain as  $\beta$ -GlcNAc-P-Und  
171 and suggest that GacL is a GlcNAc transferase using  $\beta$ -GlcNAc-P-Und as GlcNAc  
172 donor for the addition of the GlcNAc side-chains to GAC.

173 **GAS synthesizes two GlcNAc-lipids *in vitro*.** To investigate the biosynthetic  
174 origin of the novel glycolipid accumulating in 5005 $\Delta$ *gacL* cells, membrane fractions from  
175 MGAS5005 were incubated with UDP-[<sup>3</sup>H]GlcNAc and analyzed for lipid products as  
176 described in Material and Methods. Experiments showed that [<sup>3</sup>H]GlcNAc was efficiently  
177 transferred from UDP-[<sup>3</sup>H]GlcNAc into two detectable GlcNAc-lipids (Fig. 3A, Table 2).  
178 The major lipid product co-migrates on TLC with the novel lipid accumulating in the  
179 5005 $\Delta$ *gacL* strain and is identified as  $\beta$ -[<sup>3</sup>H]GlcNAc-P-Und, as described above. The  
180 minor product is assumed to be [<sup>3</sup>H]GlcNAc-P-P-Und, since it co-migrates with authentic  
181 GlcNAc-P-P-Und synthesized in *B. cereus* membranes (Fig. 3B) (23) and its formation  
182 is potently inhibited by tunicamycin (Fig. S1).

183 **GacI encodes a UDP-GlcNAc:Und-P GlcNAc transferase activity.** The GAS  
184 polysaccharide gene cluster contains a gene, *gacI*, reported to be required for GlcNAc  
185 addition to cell wall polysaccharide (5) and annotated as a GT-A type  
186 glycosyltransferase. The following studies were conducted to determine if GAS GacI  
187 might be responsible for the synthesis of GlcNAc-P-Und. To determine if GacI function  
188 was essential for formation of GlcNAc-P-Und, we generated a deletion of *gacI* in the  
189 MGAS5005. In agreement with published data (5) 5005 $\Delta$ *gacI* lost reactivity with anti-  
190 GAC antibodies, indicating a loss of GlcNAc modification in polyrhamnose (Fig. 1B).  
191 When 5005 $\Delta$ *gacI* membrane fractions were incubated with [<sup>3</sup>H]UDP-GlcNAc no  
192 incorporation into [<sup>3</sup>H]GlcNAc-P-Und was observed and only the minor lipid,  
193 [<sup>3</sup>H]GlcNAc-P-P-Und was found (Fig. 3C, Table 2), strongly supporting an essential role  
194 for GacI in GlcNAc-P-Und synthesis. The observation that the 5005 $\Delta$ *gacL* strain  
195 synthesizes normal levels of [<sup>3</sup>H]GlcNAc-P-Und *in vitro* (Fig. 3D) indicates that  
196 5005 $\Delta$ *gacL* does not fail to add GlcNAc side-chains to polyrhamnose due to a lack of  
197 GlcNA-P-Und and supports the conclusion that GacL may be the GlcNAc-P-  
198 Und:polyRhamnan GlcNAc transferase.

199 To confirm the role of GacI in GlcNAc-P-Und biosynthesis we expressed GAS GacI  
200 in *E. coli*. When membrane fractions from *E. coli* carrying an empty vector were

201 incubated with UDP- $^{3}\text{H}$ GlcNAc and analyzed by silica gel TLC, a small peak of  
202  $^{3}\text{H}$ GlcNAc-P-P-Und was found (Table 2, Fig. S4A). In contrast, the membranes of  
203 recombinant *E. coli* expressing Gacl accumulated two products corresponding to a  
204 small amount of GlcNAc-P-P-Und and a very large amount of GlcNAc-P-Und (Table 2,  
205 Fig. S4B). Thus, our data strongly indicate that Gacl is the GlcNAc-P-Und synthase.

206 **Gacl homologs in GBS and *E. faecalis* function in the biosynthesis of GlcNAc-**  
207 **P-Und.** The presence of GlcNAc-P-P-Und and GlcNAc-P-Und have been previously  
208 reported in *B. cereus* and *Bacillus megaterium* (12, 23). Our *in vitro* studies show that  
209 the MGAS5005 strain synthesizes two  $^{3}\text{H}$ GlcNAc-lipids that exactly co-migrate on TLC  
210 with the previously reported  $^{3}\text{H}$ GlcNAc-lipids from *B. cereus* (Fig. 3A and 3B).  
211 Moreover, an analysis of bacterial genomes using Gacl in a BLAST search identified a  
212 Gacl homolog (60% identity) in *B. cereus* and *B. megaterium*, suggesting its role in the  
213 GlcNAc-P-Und biosynthesis in these bacteria. Furthermore, *gacl* homologs were  
214 identified in the polysaccharide biosynthesis gene clusters of the important human  
215 pathogens *E. faecalis* (*epal* with 48% sequence identity) (24) and *S. agalactiae* (Group  
216 B Streptococcus or GBS) (SAN\_1536 gene with 46% sequence identity) (Fig. S2). To  
217 investigate whether the GBS homolog of Gacl also catalyzes the formation of GlcNAc-  
218 P-Und, we engineered a knock out of the Gacl homolog in GBS COH1. Although GBS  
219 COH1 membranes synthesize both  $^{3}\text{H}$ GlcNAc-P-P-Und and  $^{3}\text{H}$ GlcNAc-P-Und (Fig.  
220 4B and Fig. S3A), GBS COH1 $\Delta$ *gacl* membranes no longer synthesize  $^{3}\text{H}$ GlcNAc-P-  
221 Und (Table 2 and Fig. S3B).

222 To confirm that the Gacl homolog detected in *E. faecalis*, *Epal* (24), also possesses  
223 GlcNAc-P-Und synthase activity, *Epal* was expressed exogenously in *E. coli* and found  
224 to actively catalyze the formation of  $^{3}\text{H}$ GlcNAc-P-Und (Table 2, Fig. S4C). Altogether,  
225 our results are consistent with the function of Gacl homologs from GAS, GBS and *E.*  
226 *faecalis* in the transfer of GlcNAc from UDP-GlcNAc to Und-P forming GlcNAc-P-Und.

227 **ATP stimulates GlcNAc-P-Und biosynthesis.** Preliminary enzymatic properties  
228 for the synthesis of  $^{3}\text{H}$ GlcNAc-P-Und established that  $\text{Mg}^{2+}$  was the preferred divalent  
229 cation and that the formation of GlcNAc-P-Und was substantially stimulated by  
230 exogenously added Und-P (as a dispersion in CHAPS detergent). In early studies of  
231 GAC biosynthesis in GAS (25), it was shown that the addition of ATP dramatically



232 stimulated incorporation of radioactive UDP-[<sup>3</sup>H]GlcNAc into [<sup>3</sup>H]GlcNAc membrane  
233 lipids and [<sup>3</sup>H]GlcNAc-polysaccharide. We confirmed that inclusion of 1 mM ATP  
234 significantly stimulated the incorporation of [<sup>3</sup>H]GlcNAc into [<sup>3</sup>H]GlcNAc-P-Und (Fig. 5  
235 and Fig. S5), as well as [<sup>3</sup>H]GlcNAc-P-P-Und (Fig. S5). However, the inclusion of ATP  
236 did not stimulate GacI activity in *in vitro* assays of CHAPS-soluble, affinity purified GacI  
237 solely dependent on exogenously added Und-P as acceptor. These data suggest that  
238 the effect of ATP addition is most likely due to formation of Und-P, *in situ*, by  
239 phosphorylation of endogenous undecaprenol by undecaprenol kinase (26).

240 **GacJ forms a complex with GacI and enhances its catalytic efficiency.** *GacJ* is  
241 located immediately downstream of *gacI* in the GAS GAC biosynthesis gene cluster and  
242 encodes a small 113 aa membrane protein (Fig. 1A). We hypothesized that GacI might  
243 form an obligate complex with GacJ. This hypothesis is based on the observation that  
244 *gacJ* and *gacI* are frequently located adjacent to each other on bacterial chromosomes  
245 and are sometimes fused to form a single polypeptide (accession numbers: GAM11018,  
246 ADH85075, ALC15489 and ADU67183). To test this hypothesis, we solubilized  
247 membranes from *E. coli* co-expressing GacJ and amino-terminal His-tagged GacI with  
248 the zwitterionic detergent CHAPS, and isolated GacI complexes using Ni-NTA  
249 chromatography (Fig. 6A). SDS-PAGE of the affinity-purified sample revealed two  
250 bands corresponding to the anticipated molecular sizes of GacI and GacJ (Fig. 6B).  
251 Proteomics analysis of the excised protein bands confirmed the identities of the  
252 recovered proteins. This result indicates that GacI and GacJ form a stable, CHAPS-  
253 soluble complex and co-purify during affinity chromatography.

254 To investigate if GacJ performs any catalytic function in association with GacI, we  
255 tested the proteins for GlcNAc-P-Und synthase activity *in vitro*, individually and in  
256 combination. When GacI was expressed singly in *E. coli*, enzymatically active protein  
257 was found in the membrane fraction (Table 2, Fig. S4B), indicating that GacI does not  
258 require GacJ for activity or membrane association. GacJ was found to be catalytically  
259 inactive when expressed by itself in *E. coli*, consistent with the observation that  
260 *5005ΔgacI* membranes show no residual GlcNAc-P-Und synthase activity. Kinetic  
261 analysis of GlcNAc-P-Und synthase activity for Und-P in membrane fractions of *E. coli*  
262 expressing GacI revealed an apparent Km of 18.7 μM (Table 3, Fig. S6A). However, co-

263 expression of GacJ dramatically lowered the apparent Km of GacI for Und-P to 1.1  $\mu$ M,  
264 suggesting a significant change in affinity for the lipid acceptor. Moreover, the  $V_{\max}$  of  
265 GacI activity increased from 54.2 pmol/min/mg to 18.5 nmol/min/mg in the presence of  
266 GacJ (Table 3, Fig. S6B). A kinetic analysis of GlcNAc-P-Und synthase for Und-P in  
267 MGAS5005 strain gave an apparent Km of 6.4  $\mu$ M and a  $V_{\max}$  of 333 pmol/min/mg  
268 (Table 3, Fig. S6C), similar to the enzymatic parameters of GacI co-expressed with  
269 GacJ in *E. coli*. These enzymatic parameters are in marked contrast to those of the  
270 GlcNAc-P transferase that synthesizes GlcNAc-P-P-Und. When a similar kinetic  
271 analysis was performed in 5005 $\Delta$ *gacI*, so that only GlcNAc-P-P-Und synthesis could be  
272 scored, an apparent Km for Und-P of 19.3  $\mu$ M was obtained and the  $V_{\max}$  was only 2.75  
273 pmol/min/mg (Table 3, Fig. S6D). Clearly, GacI displays a much greater catalytic  
274 efficiency for the synthesis of GlcNAc-P-Und than the enzyme synthesizing GlcNAc-P-  
275 P-Und, which is reflected in the dramatic difference in the rates of synthesis of the two  
276 glycolipids. In summary, our data indicate that GacJ forms a stable association with  
277 GacI and stimulates the catalytic activity of GacI.

278 **GlcNAc-P-P-Und is required for initiation of polyrhamnose polysaccharide**  
279 **biosynthesis.** The GAS genome contains a close relative, *gacO*, of *E. coli wecA*, the  
280 tunicamycin-sensitive GlcNAc-phosphate transferase responsible for the synthesis of  
281 GlcNAc-P-P-Und in many bacteria (11, 12). Significantly, rhamnopolysaccharide  
282 synthesis in GAS is inhibited by tunicamycin (5) and a close homolog of GacO, *S.*  
283 *mutans* RpgP, has been shown to be required for rhamnopolysaccharide synthesis and  
284 can complement *WecA* deficiency in *E. coli* (13). Our analysis of UDP-[<sup>3</sup>H]GlcNAc  
285 incorporation in GAS and GBS membrane lipids, revealing the presence of two GlcNAc-  
286 lipids, GlcNAc-P-Und and GlcNAc-P-P-Und, prompted us to investigate the role of  
287 GlcNAc-P-P-Und in the initiation of GAC biosynthesis. First, we investigated the role of  
288 GacO in the synthesis of GlcNAc-P-P-Und. When membrane fractions from the *WecA*  
289 deficient *E. coli* strain (CLM37) expressing GacO, CLM37:GacO, were incubated with  
290 UDP-[<sup>3</sup>H]GlcNAc and Und-P (added as a dispersion in 1 % CHAPS), [<sup>3</sup>H]GlcNAc-P-P-  
291 Und was formed at an enzymatic rate that is similar to that found in the *WecA* over-  
292 expressor strain, PR4019 (Fig. 7A). CLM37 carrying an empty vector synthesizes no  
293 detectable GlcNAc-P-P-Und under these conditions (Fig. 7A).

294 To test whether GlcNAc-P-P-Und might function as a membrane anchor for the  
295 synthesis of the polyrhamnose chain of the rhamnopolysaccharide, membrane fractions  
296 from MGAS5005 or the 5005 $\Delta$ *gacI* mutant were pre-incubated with UDP-[<sup>3</sup>H]GlcNAc  
297 and ATP, to form [<sup>3</sup>H]GlcNAc-P-P-Und *in situ*, and chased with non-radioactive dTDP-  
298 rhamnose. The formation of the resultant [<sup>3</sup>H]GlcNAc-lipids in 5005 $\Delta$ *gacI* was analyzed  
299 by TLC on silica gel G after 30 min incubation as shown in (Fig. 7B and C). In the  
300 absence of TDP-rhamnose, 5005 $\Delta$ *gacI* membranes produced only [<sup>3</sup>H]GlcNAc-P-P-Und  
301 (Fig. 7B), whereas in the presence of TDP-rhamnose two radioactive products,  
302 [<sup>3</sup>H]GlcNAc-P-P-Und and an additional product with slower mobility on TLC was  
303 observed (Fig 7C). Figure S7 shows the time course of accumulation of the new  
304 GlcNAc-lipid product. Significantly, parallel incubations with MGAS5005 showed that  
305 GlcNAc-P-Und was not glycosylated further. These results strongly support the  
306 possibility that GlcNAc-P-P-Und is an acceptor for rhamnosyl units in GAS and may  
307 function as the lipid anchor for polyrhamnosyl polysaccharide synthesis.

#### 308 **The GacL mutant displays increased sensitivity to peptidoglycan amidases.**

309 The Gram-positive cell wall protects interior structures, plasma membrane and  
310 peptidoglycan, from host defense peptides and hydrolytic and antimicrobial enzymes. It  
311 has been shown that the GacI mutant which is GlcNAc-deficient is more sensitive to LL-  
312 37-induced killing (5). To test the hypothesis that the loss of GlcNAc decorations in GAC  
313 alters cell wall permeability, we investigated the sensitivity of 5005 $\Delta$ *gacL* to  
314 peptidoglycan amidases: PlyC (27), PlyPy (28) and CbpD (29). When 5005 $\Delta$ *gacL* cells  
315 were grown in increasing concentrations of CbpD (Fig. 8A), PlyPy (Fig. 8B) or PlyC (Fig.  
316 8C) cellular growth was dramatically inhibited compared to MGAS5005, indicating  
317 increased sensitivity to the presence of amidases.

318

#### 319 **DISCUSSION**

320 In almost all Gram-positive bacteria, cell wall-attached glycopolymers are critical for cell  
321 envelope integrity and their depletion is lethal (30). Most streptococcal species including  
322 two human pathogens GAS and GBS do not synthesize WTA and instead produce Rha-  
323 containing glycopolymers as functional homologs of WTA (1). GAC is the major cell wall  
324 component of GAS and plays important roles in bacterial physiology and pathogenesis.

325 The polyrhamnose core of GAC is modified with GlcNAc in an approximately 2:1 ratio  
326 (3, 7) of rhamnose to GlcNAc. Collectively, the results of our study suggest a molecular  
327 mechanism of GAC biosynthesis in which rhamnan polymer is assembled at the  
328 cytoplasmic face of the plasma membrane, translocated to the cell surface and modified  
329 by GlcNAc on the outer side of the membrane as illustrated in Figure 9. We report that a  
330 lipid carrier, GlcNAc-P-P-Und, synthesized by GAS GacO, is a potential acceptor for  
331 initiation of rhamnan backbone biosynthesis. We speculate that the next step of  
332 rhamnan biosynthesis involves the action of the GacB, GacC, GacG and GacF  
333 glycosyltransferases. The lipid-anchored polyrhamnose is then translocated across the  
334 membrane by the ABC transporter encoded by *gacD* and *gacE*. This hypothesis is  
335 supported by studies of rhamnan biosynthesis in *S. mutans* (13, 31, 32).

336 Biosynthesis of the rhamnan-backbone of GAC is likely essential for GAS viability  
337 because the GacA enzyme involved in dTDP-rhamnose biosynthesis (14), and GacB  
338 and GacC glycosyltransferases are indispensable in GAS (5). In contrast, deletion of  
339 genes required for GlcNAc attachment to the rhamnan backbone does not affect GAS  
340 viability (5). This observation supports our hypothesis that biosynthesis of polyrhamnose  
341 and its translocation to the cell surface occur separately from the pathway involved in  
342 polyrhamnose modification with GlcNAc. In this study, we found that GlcNAc  
343 modification of rhamnan requires GlcNAc-P-Und synthesis. Previously, GlcNAc-P-Und  
344 was isolated from various *Bacilli* membranes (12, 23). However the enzyme required for  
345 GlcNAc-P-Und biosynthesis was not identified and the biological function of this lipid  
346 remained unknown. Our *in vitro* analysis of UDP-GlcNAc incorporation into GlcNAc-  
347 lipids by GAS membranes showed that GacI was required for the biosynthesis of  
348 GlcNAc-P-Und. Moreover CHAPS-soluble, affinity-purified GacI protein catalyzed the  
349 transfer of GlcNAc from UDP-GlcNAc to Und-P yielding GlcNAc-P-Und in an *in vitro*  
350 reaction system.

351 Interestingly, we found that, in contrast to *B. cereus*, GAS and GBS membranes  
352 incubated with UDP-[<sup>3</sup>H]GlcNAc synthesized primarily [<sup>3</sup>H]GlcNAc-P-Und. Since GacI  
353 and GacO utilize a common pool of Und-P, this phenomenon is presumably due to a  
354 much higher apparent affinity of GacI for Und-P compared to GacO. Significantly, we  
355 observed a measurable increase in [<sup>3</sup>H]GlcNAc incorporation into [<sup>3</sup>H]GlcNAc-P-P-Und

356 in the GacI deletion mutant. This observation further confirmed that the relative  
357 synthetic rates of GlcNAc-P-Und and GlcNAc-P-P-Und biosynthesis are determined  
358 largely by Und-P availability. Furthermore, we found that the formation of GlcNAc-P-Und  
359 and GlcNAc-P-P-Und in GAS membranes was significantly stimulated by ATP. Since  
360 GacI activity is not stimulated directly by ATP, it is likely that the effect of ATP is due to  
361 increased formation of Und-P, *in situ*, via undecaprenol kinase activity. In *S. mutans*,  
362 membrane-associated undecaprenol kinase catalyzes the ATP-dependent  
363 phosphorylation of undecaprenol to Und-P (26). It is likely that the homolog of this  
364 enzyme encoded by M5005\_Spy\_0389 is responsible for Und-P biosynthesis in GAS.

365 Wzx flippases translocate Und-P-P-linked oligosaccharides from the cytoplasmic  
366 side to the periplasmic side of membranes in bacteria (33). We suggest that GacK may  
367 function to transport GlcNAc-P-Und to the extracellular space for utilization as GlcNAc  
368 donor in the GlcNAc modification of polyrhamnose. This hypothesis is based on the  
369 GlcNAc-deficient phenotype of the GacK mutant (5) and the high domain homology  
370 between GacK and proteins of the Wzx family of flippases. However, further research  
371 will be required to confirm this hypothesis. The phenotypes of the GacL mutant:  
372 absence of the GlcNAc side-chains in GAC and accumulation of GlcNAc-P-Und in the  
373 membrane is consistent with GacL functioning in the transfer of GlcNAc from GlcNAc-P-  
374 Und to polyrhamnose yielding GlcNAc-modified polysaccharide. Bioinformatics  
375 searches with the HHPred program against available protein structures identified the  
376 GT-C superfamily of glycosyltransferases as the closest structural homologs of GacL.  
377 The members of the GT-C superfamily consist of proteins characterized with multiple  
378 transmembrane domains and a large periplasmic loop close to the N-terminus that  
379 contains a metal-binding motif (DxD, ExD, DDx or DEx) (34, 35). The GT-C enzymes  
380 act on the outside of the plasma membrane by transferring sugars from the lipid carrier,  
381 Und-P, onto either glycolipid or protein. GacL contains 12 transmembrane segments  
382 and the highly conserved DEX motif in the first extracellular loop. Thus, the predicted  
383 structural homology of GacL is in agreement with the proposed GacL function in GlcNAc  
384 transfer from GlcNAc-P-Und to polyrhamnose.

385 Thus, we suggest that the proposed mechanism of GlcNAc attachment to  
386 polyrhamnose in GAS is similar to the mechanism of O-antigen modification in *Shigella*

387 *flexneri* in which the GtrB glycosyltransferase, together with GtrA flippase and GtrV  
388 membrane protein, are required for addition of a glycosyl group to rhamnose of the O-  
389 antigen backbone polysaccharide, which is a part of lipopolysaccharide (36). The  
390 modification with glycosyl residues takes place after O-unit assembly and before  
391 transfer of the mature O-polysaccharide to the lipid A-core region of the  
392 lipopolysaccharide. Moreover, in *Mycobacterium tuberculosis* the modification of cell  
393 wall arabinogalactan with galactosamine occurs through similar mechanism involving N-  
394 acetyl galactosaminyl-phosphate-undecaprenol synthase, PpgS, and a membrane  
395 associated GT-C enzyme, Rv3779, that transfers a galactosamine residue from  
396 galactosaminyl-phosphate-undecaprenol to arabinogalactan (37).

397 The last step of GAC biosynthesis is probably similar to the last step of WTA  
398 biosynthesis: it involves attachment of GAC to certain MurNAc residues in  
399 peptidoglycan via a phosphate ester linkage (38). It is likely catalyzed by members of  
400 LytR-CpsA-Psr (LCP) phosphotransferase family encoded by M5005\_Spy\_1099 and  
401 M5005\_Spy\_1474.

402 GacI is predicted by the HHpred server to have structural homology to  
403 polyisoprenyl-glycosyltransferase GtrB from *Synechocystis* which is a homolog of *S.*  
404 *flexneri* GtrB (39). GtrB homologs in bacteria and eukaryotes belong to GT-A  
405 superfamily of glycosyltransferases and they are responsible for the addition of UDP-  
406 glucose to the bactoprenol carrier in the cytoplasm yielding the Und-P-glucose  
407 precursor in bacteria and dolichol phosphate-glucose precursor in eukaryotes (34, 35).  
408 Our BLAST search using the GacI sequence as query found homologs of this gene in  
409 many bacterial species, with the broadest diversity observed in the phylum Firmicutes  
410 (Supplemental File). To determine evolutionary relationships between the GacI  
411 homologs, these sequences were analyzed using CLANS (CLuster ANalysis of  
412 Sequences) (40) (Fig. 10). It is noteworthy that the *B. cereus* GacI has two homologs  
413 clustered in two different groups. Our bioinformatics analysis shows that these *gacI*  
414 homologs are located in different gene clusters encoding proteins involved in  
415 polysaccharide biosynthesis and transport. Moreover, the GAS GacI subgrouped with  
416 one *B. cereus* GacI. The GBS GacI and *E. faecalis* GacI homologs are located in the  
417 cluster well-separated from the GAS GacI subgroup. Thus, this observation points to

418 possible horizontal gene transfer between GAS and *Bacillus*. Analysis of UDP-GlcNAc  
419 incorporation into GlcNAc-lipids in a GBS *gacI* knock-out strain confirmed the function of  
420 this gene in the biosynthesis of GlcNAc-P-Und in GBS. Additionally, we demonstrated  
421 that the *E. faecalis* GacI homolog (Epal) functions in the biosynthesis of GlcNAc-P-Und.  
422 Significantly, the presence of GacI homologs in GBS and *E. faecalis* matches the  
423 reported occurrence of GlcNAc residues in the cell wall polysaccharides of these  
424 bacteria (41-44).

425 GacJ, a small membrane protein with three transmembrane  $\alpha$ -helices, is required  
426 for GlcNAc side-chain attachment to polyrhamnose (5). GacJ belongs to DUF2304  
427 family of proteins according to the Pfam protein family database (45). In *Geobacter* sp.,  
428 *Desulfuromonas* sp., *Desulfurivibrio alkaliphilus*, *Desulfuromonas soudanensis* and  
429 *Desulfurispirillum indicum*, DUF2304 homologous domains are fused with *gacI*  
430 homologs (Fig. 10 and supplemental file). In *M. tuberculosis* a GacJ homolog, Rv3632,  
431 is co-transcribed with the gene encoding N-acetyl galactosaminyl-phosphate-  
432 undecaprenol synthase, PpgS, and is found to stimulate PpgS activity (37). Consistent  
433 with this finding we showed that GacI and GacJ form a complex and co-expression of  
434 GacI with GacJ significantly enhanced GacI catalytic activity. Further work is under way  
435 to characterize the mechanism of GacJ action on GacI activity.

436 The identification of the mechanism of GlcNAc attachment to polyrhamnose raises  
437 the question of how this modification functions biologically in bacteria. It has been  
438 previously found that the  $\Delta gacI$  mutant is hypersusceptible to human antimicrobial  
439 peptide LL-37 and the antimicrobial action of factors released by thrombin-activated  
440 platelets, suggesting a role of GlcNAc modification in protecting the plasma membrane  
441 from antimicrobial agents (5). Our study identified the importance of GlcNAc for  
442 protection of GAS peptidoglycan from amidase-induced lysis. In *E. faecalis* the GacI  
443 homolog, Epal, is involved in biosynthesis of a cell wall-attached polysaccharide (24),  
444 however the polysaccharide structure of the mutant has not been elucidated. The  $\Delta epal$   
445 mutant was defective in conjugative transfer of a plasmid and resistance of bacteria to  
446 detergent and bile salts (24).

447 In conclusion, our study provides a platform for elucidation of novel pathways of  
448 glycopolymer biosynthesis in other bacterial pathogens including important drug-

449 resistant bacteria such as *E. faecalis* and *Clostridium sordellii* that possess GacI and  
450 GacJ homologs. Since the enzymes involved in the biosynthesis of cell wall attached  
451 glycopolymers are promising targets for novel antimicrobials and the glycopolymers  
452 represent important features for diagnostics and vaccine targets, our data may provide  
453 opportunities for developing novel therapeutics against antibiotic-resistant bacterial  
454 pathogens.

## 455 **MATERIALS AND METHODS**

456 **Bacterial strains and growth conditions.** All plasmids, strains and primers used in  
457 this study are listed in Tables S1 and S2 in the supplemental material. The strains used  
458 in this study were GAS M1-serotype strain MGAS5005 (16), *Bacillus cereus* (ATCC  
459 14579), *Streptococcus agalactiae* COH1 (Group B *Streptococcus* or GBS), *E. coli*  
460 CLM37 (46), *E. coli* PR4019 (12), *E. coli* DH5 $\alpha$  and *E. coli* Rosetta (DE3). GAS and  
461 GBS cultures were grown in Todd-Hewitt broth (BD) supplemented with 0.2% yeast  
462 extract (THY), or on THY agar plates at 37 °C. *E. coli* and *B. cereus* strains were grown  
463 in Luria-Bertani (LB) medium or on LB agar plates at 37 °C. When required, antibiotics  
464 were included at the following concentrations: ampicillin at 100  $\mu\text{g ml}^{-1}$  for *E. coli*;  
465 streptomycin at 100  $\mu\text{g ml}^{-1}$  for *E. coli*; erythromycin at 500  $\mu\text{g ml}^{-1}$  for *E. coli* and 1  $\mu\text{g}$   
466  $\text{ml}^{-1}$  for GAS and GBS; chloramphenicol at 10  $\mu\text{g ml}^{-1}$  for *E. coli* and 5  $\mu\text{g ml}^{-1}$  for GAS;  
467 spectinomycin at 200  $\mu\text{g ml}^{-1}$  for *E. coli* and 100  $\mu\text{g ml}^{-1}$  for GAS and GBS.

468 **DNA techniques.** Plasmid DNA was isolated from *E. coli* by commercial kits  
469 (Qiagen) according to the manufacturer's instructions and used to transform *E. coli*,  
470 GAS and GBS strains. Plasmids were transformed into GAS and GBS by  
471 electroporation as described previously (47). Chromosomal DNA was purified from GAS  
472 and GBS as described in (48). To construct single-base substitutions or deletion  
473 mutations, we used the QuikChange® II XL Site-Directed Mutagenesis Kit (Stratagene)  
474 according to the manufacturer's protocol. Constructs containing mutations were  
475 identified by sequence analysis. Primers for site-directed mutagenesis are listed in  
476 Table S3. All constructs were confirmed by sequencing analysis (Eurofins MWG  
477 Operon).

478 **Construction of the *gacI* deletion mutant in GAS.** For construction of strain  
479 5005 $\Delta$ *gacI*, MGAS5005 chromosomal DNA was used as a template for amplification of



480 two DNA fragments using two primers pairs: *GacIm-BamHI-f/GacIdel-r* and *GacIdel-*  
481 *f/GacIm-XhoI-r* (Table S2). Primer *GacIdel-f* is complementary to primer *GacIdel-r*. The  
482 two gel-purified PCR products containing complementary ends were mixed and  
483 amplified using a PCR overlap method (49) with primer pair *GacIm-BamHI-f/GacIm-*  
484 *XhoI-r* to create the deletion of *gacI*. The PCR product was digested with *BamHI* and  
485 *XhoI* and ligated into *BamHI/Sall*-digested temperature-sensitive shuttle vector  
486 pJRS233 (50). The plasmid was designated pJRS233 $\Delta$ *gacI* (Table S1). The resulting  
487 plasmid was transformed into MGAS5005, and erythromycin resistant colonies were  
488 selected on THY agar plates at 30 °C. Integration was performed by growth of  
489 transformants at 37 °C with erythromycin selection. Excision of the integrated plasmid  
490 was performed by serial passages in THY media at 30 °C and parallel screening for  
491 erythromycin-sensitive colonies. Mutants were verified by PCR sequencing of the loci.

492 **Construction of the *gacL* deletion mutant in GAS.** To create *BglII* and *XhoI*  
493 cloning sites in the polylinker region of pUC19, site-directed mutagenesis of the  
494 plasmid, using the primer pair listed in Table S3 was carried out. The plasmid was  
495 designated pUC19BX. The nonpolar *aadA* spectinomycin resistance cassette was  
496 amplified from pLR16T (Table S2) using primers *Spec-Sall-f/Spec-BamH-r* (Table S2),  
497 digested with *Sall/BamHI*, and ligated into *Sall/BamHI*-digested pUC19BX to yield  
498 pUC19BXspec. MGAS5005 chromosomal DNA was used as a template for  
499 amplification of two DNA fragments using two primers pairs: *gacLup-BglII-f/gacLup-Sall-*  
500 *r* and *gacLdown-BamHI-f/gacLdown-XhoI-r* (Table S2). The first PCR product was  
501 digested with *BglII/Sall* and ligated into *BglII/Sall*-digested pUC19BXspec. The resultant  
502 plasmid, pUC19BXspecL1, was digested with *BamHI/XhoI* and used for ligation with the  
503 second PCR product that was digested with *BamHI/XhoI*. The resultant plasmid,  
504 pUC19BXspecL2, was digested with *BglII* and *XhoI* to obtain a DNA fragment  
505 containing *aadA* flanked with the *gacL* upstream and downstream regions. The DNA  
506 fragment was ligated into pPHY304 vector (51) and digested with *BamHI/XhoI* to yield  
507 pPHY304 $\Delta$ *gacL*. The resulting plasmid was transformed into MGAS5005, and  
508 erythromycin resistant colonies were selected on THY agar plates at 30 °C. The  
509 mutants were isolated as describe above. 5005 $\Delta$ *gacL* mutants were screened for  
510 sensitivity to spectinomycin and verified by PCR sequencing of the loci.

511 **Complementation of the 5005 $\Delta$ *gacL* mutant with *gacL* (5005 $\Delta$ *gacL gacL*<sup>+</sup>).**

512 To construct the plasmid for complementation of the 5005 $\Delta$ *gacL* mutant, MGAS5005  
513 chromosomal DNA was used as a template for amplification of a wild-type copy of *gacL*  
514 using the primer pair *GacL*-*XhoI*-f and *GacL*-*BglIII*-r (Table S2). The PCR products were  
515 digested with *XhoI* and *BglIII* and cloned in pBBL740 (Table S1) previously digested with  
516 the respective enzymes. The integrational plasmid pBBL740 does not have a replication  
517 origin that is functional in GAS, so the plasmid can be maintained only by integrating  
518 into the GAS chromosome through homologous recombination. The resultant plasmid  
519 p*GacL* was transformed into 5005 $\Delta$ *gacL* by electroporation and transformants were  
520 selected on agar plates containing chloramphenicol. Several chloramphenicol resistant  
521 colonies were selected and *gacL* integration into the chromosome was confirmed by  
522 sequencing a PCR fragment.

523 **Construction of the *gacI* (SAN\_1536) deletion mutant in GBS.** GBS COH1

524 chromosomal DNA was used as a template for amplification of two DNA fragments  
525 using two primers pairs: *gbsIup*-*BglIII*-f/*gbsIup*-*Sall*-r and *gbsId*-*BamHI*-f/*gbsId*-*XhoI*-r  
526 (Table S2). The plasmid for *gacI* (SAN\_1536) knock-out was constructed using the  
527 same strategy described for *gacL* deletion (see above). The resultant plasmid,  
528 pHY304GBS $\Delta$ I, was transformed into GBS COH1, and erythromycin resistant colonies  
529 were selected on THY agar plates at 30 °C. The mutants were isolated as described  
530 above. GBS COH1  $\Delta$ *gacI* mutants were screened for sensitivity to spectinomycin and  
531 verified by PCR sequencing of the loci.

532 **Construction of the plasmids for *E. coli* expression of *GacI*, *GacJ* and *GacO*.**

533 To create a vector for expression of *GacI* from GAS, the gene was amplified from  
534 MGAS5005 chromosomal DNA using the primer pair *GacI*-*NcoI*-f and *GacI*-*XhoI*-r  
535 (Table S2). The PCR product was digested with *NcoI* and *XhoI*, and ligated into  
536 *NcoII*/*XhoI*-digested pRSF-NT vector (Table S1). The resultant plasmid, p*GacI*,  
537 contained *gacI* fused at the N-terminus with a His-tag followed by a TEV protease  
538 recognition site. To create a vector for expression of *GacI* and *GacJ*, the bicistronic  
539 DNA fragment was amplified from MGAS5005 chromosomal DNA using the primer pair  
540 *GacI*-*NcoI*-f and *GacJ*-*XhoI*-r (Table S2). The vector was constructed as described  
541 above. The plasmid was designated p*GacIJ*. pET21\_NESG plasmid for expression of

542 the GacI homolog, Epal, from *Enterococcus faecalis* was obtained from the DNASU  
543 repository (52). The construct was confirmed by sequencing analysis. The plasmids  
544 were transferred into competent *E. coli* Rosetta (DE3) (Novagen) using the  
545 manufacturer's protocol.

546 To create a vector for expression of GacO, the gene was amplified from MGAS5005  
547 chromosomal DNA using the primer pair GacO-Xba-f and GacO-HindIII-r (Table S2).  
548 The PCR product was digested with XbaI and HindIII, and ligated into XbaI/HindIII-  
549 digested pBAD33 vector. The resultant plasmid, pGacO, was transferred into competent  
550 *E. coli* CLM37 strain that has a deletion of the *wecA* gene.

#### 551 **Construction of the plasmids for *E. coli* expression of PlyPy, CbpD and PlyC.**

552 To create a vector for expression of CbpD amidase (29), the gene was amplified from  
553 MGAS5005 chromosomal DNA using the primer pair 28-NcoI-f and 28-stop-r (Table  
554 S2). The PCR product was digested with NcoI and XhoI, and ligated into NcoI/XhoI-  
555 digested pRSF-NT vector. The resultant plasmid, pCbpD, contained *cbpD* fused at the  
556 N-terminus with a His-tag followed by a TEV protease recognition site. To create a  
557 vector for expression of PlyPy amidase (28), the gene was amplified from MGAS5005  
558 chromosomal DNA using the primer pair PlyPy-NcoI-f and PlyPy-XhoI-r. The PCR  
559 product was digested with NcoI and XhoI, and ligated into NcoI/XhoI-digested pET-21d  
560 vector. The resultant plasmid, pPlyPy contained the gene fused at the C terminus with a  
561 His-tag.

562 To create a vector for expression of PlyC amidase (53), a DNA fragment spanning  
563 bicistronic operon which encodes *plyCA* and *plyCB* (27) was synthesized by  
564 ThermoFisher Scientific. The plasmid was digested with NcoI and XhoI, and ligated into  
565 NcoI/XhoI-digested pET21d vector. The resultant plasmid, pPlyC contained *plyCA*  
566 followed by *plyCB* fused at the C terminus with a His-tag.

567 **Expression and purification of GacI, Epal and GacI/GacJ complex.** For  
568 expression of GacI, Epal and GacI/GacJ complex, *E. coli* Rosetta (DE3) cells carrying  
569 the respective plasmid were grown to an OD<sub>600</sub> of 0.4-0.6 and induced with 1 mM IPTG  
570 at 18 °C for approximately 16 hours. The cells were lysed in 20 mM Tris-HCl pH 7.5,  
571 300 mM NaCl with two passes through a EmulsiFlex-C5 microfluidizer cell disrupter  
572 (Avestin, Inc., Ottawa Ontario, CA). The lysate was centrifuged at 7000 x g for 30

573 minutes, 4°C. The supernatant was centrifuged at 30,000 x g for 60 minutes, 4°C to  
574 isolate the membrane fraction.

575 To isolate GacI/GacJ complexes the membrane proteins were solubilized in 2.5%  
576 CHAPS, 20 mM Tris-HCl pH 7.5, 300 mM NaCl for 60 minutes, rotating at room  
577 temperature. Insoluble material was removed by centrifugation at 30,000 x g for 60  
578 minutes, 4°C. Solubilized GacI/GacJ were purified by Ni-NTA chromatography with  
579 washes of 2.5% CHAPS, 20 mM Tris-HCl pH 7.5, 300 mM NaCl and 2.5% CHAPS, 20  
580 mM Tris-HCl pH 7.5, 300 mM NaCl, 10 mM imidazole, and elution with 2.5% CHAPS, 20  
581 mM Tris-HCl pH 7.5, 300 mM NaCl, 250 mM imidazole. The GacI/GacJ complex was  
582 further purified by size exclusion chromatography on a Superdex 200 (GE Biosciences)  
583 column in 2.5% CHAPS, 20 mM HEPES pH 7.5, 100 mM NaCl, with monitoring for  
584 protein elution at 280 nm.

585 **Expression of GacO.** For expression of GacO, *E. coli* CLM37 cells carrying the  
586 pertinent plasmid were grown to an OD<sub>600</sub> of 0.8 and induced with 13 mM L-arabinose  
587 at 25 °C for approximately 3 hours. The cells were lysed in 20 mM Tris-HCl pH 7.5, 300  
588 mM NaCl with two passes through a microfluidizer cell disrupter. The lysate was  
589 centrifuged at 1000 x g for 15 minutes, 4 °C. The supernatant was centrifuged at 40,000  
590 x g for 60 minutes, 4 °C to isolate the membrane fraction.

591 **Expression and purification of PlyPy, CbpD and PlyC.** For expression and  
592 purification of PlyPy, CbpD and PlyC, *E. coli* Rosetta (DE3) cells carrying the respective  
593 plasmids were grown to an OD<sub>600</sub> of 0.4-0.6 and induced at 18 °C with 1 mM IPTG for  
594 approximately 16 hours. The cells were lysed in 20 mM Tris-HCl pH 7.5, 300 mM NaCl  
595 with two passes through a microfluidizer cell disrupter. The soluble fraction was purified  
596 by Ni-NTA chromatography with washes of 20 mM Tris-HCl pH 7.5, 300 mM NaCl and  
597 20 mM Tris-HCl pH 7.5, 300 mM NaCl, 10mM imidazole, and elution with 20 mM Tris-  
598 HCl pH 7.5, 300 mM NaCl, 250 mM imidazole. The PlyPy and CbpD eluate was further  
599 purified by size exclusion chromatography on a Superdex 200 column in 20 mM HEPES  
600 pH 7.5, 100 mM NaCl for PlyPy, or 20 mM MOPS pH 6.5, 100 mM NaCl for CbpD. PlyC  
601 was further purified by anion exchange chromatography on a MonoQ 5/50 GL (GE  
602 Biosciences) column in 10 mM sodium phosphate pH 6.0, and a 20 column volume  
603 elution gradient of 0-500 mM NaCl.

604 **Isolation of GAS and GBS membranes.** Bacteria were grown at 37 °C to an OD<sub>600</sub>  
605 of 0.8. To obtain GAS cell membranes, cell pellet was re-suspended in phosphate-  
606 buffered saline (PBS) and incubated 1 h with PlyC lysin as described in (54). To obtain  
607 GBS membranes, the cell pellet was re-suspended in acetate buffer (50 mM  
608 CH<sub>3</sub>COONa, 10 mM CaCl, 50 mM NaCl, pH 5) and incubated with mutanolysin (200  
609 U/ml, Sigma–Aldrich) for 2 h at 37 °C. After hydrolytic enzyme treatment the bacterial  
610 suspension was sonicated using a Fisher Scientific™ Model 505 Sonic Dismembrator,  
611 15 times ×15 s. After centrifugation at 8,000 g for 10 min at 4 °C, the supernatant was  
612 collected and centrifuged at 40,000 g for 60 min. The pellet was collected as the  
613 membrane fraction.

614 **Mass-spectrometry analysis of GacI and GacJ.** LC-MS/MS for proteomic  
615 analysis was performed using an LTQ-Orbitrap mass spectrometer (Thermo Fisher  
616 Scientific) coupled with an Eksigent Nanoflex cHiPLC system (Eksigent) through a  
617 nanoelectrospray ionization source. The LC-MS/MS data were subjected to database  
618 searches for protein identification using Proteome Discoverer software V. 1.3 (Thermo  
619 Fisher Scientific) with a local MASCOT search engine.

620 **Dot-blot analysis.** Bacterial cells (1 ml) from exponential phase cultures  
621 (OD<sub>600</sub>=0.8) was centrifuged, washed with PBS, resuspended in 100 µl of PBS and  
622 incubated with 1 µl PlyC (1.5 mg/ml) for 1 h at 37°C. After centrifugation at 16,000 g for  
623 2 min, 5 µl of the supernatant was spotted on a nitrocellulose membrane. The  
624 membrane was blocked 1 h with 7% skim milk in PBS with 0.1% Tween 20, and  
625 incubated overnight with an anti-GAC antibody diluted 1:5,000 (ab9191; Abcam). Bound  
626 antibodies were detected with a peroxidase-conjugated goat anti-rabbit immunoglobulin  
627 G antibody, and the Amersham ECL (enhanced chemiluminescence) Western blotting  
628 system.

629 **Binding of succinylated wheat germ agglutinin (sWGA) to bacteria.** MGAS5005  
630 and 5005Δ*gacL* cells were collected during mid-exponential phase (OD<sub>600</sub>=0.6), washed  
631 three times with BSA-saline solution (0.5% BSA, 0.15 M NaCl), resuspended in BSA-  
632 saline solution and incubated for 30 minute at 37 °C with mixing. GlcNAc specific  
633 fluorescein-sWGA was added to final concentrations of 0, 12.5, 25, 50, 100 µg/ml. After  
634 1 h of incubation at 37 °C with mixing, the cells were centrifuged, washed twice, and

635 resuspended in BSA-saline. Bound fluorescein-sWGA was quantified in a fluorimeter  
636 SpectraMax M5 (Molecular Devices) using an excitation of 544 nm and emission of 590  
637 nm.

638 **Isolation of cell wall from GAS.** MGAS5005 and 5005 $\Delta$ *gacL* cell wall was  
639 prepared from exponential phase cultures ( $OD_{600}=0.8$ ) by the SDS-boiling procedure as  
640 described for *Streptococcus pneumoniae* (55). Purified cell wall samples were  
641 lyophilized and used for composition analysis.

642 **Carbohydrate composition analysis.** Carbohydrate composition analysis was  
643 performed at the Complex Carbohydrate Research Center (Athens, GA) by combined  
644 gas chromatography/mass spectrometry (GC/MS) of the per-O-trimethylsilyl (TMS)  
645 derivatives of the monosaccharide methyl glycosides produced from the sample by  
646 acidic methanolysis as described previously by (56).

647 **Assay of lytic activity of PlyPy, CbpD and PlyC.** Aliquots of MGAS5005 and  
648 5005 $\Delta$ *gacL* frozen stocks [prepared as described in (57)] were inoculated into THY  
649 medium 1:20. To a 96 well plate, 200  $\mu$ L aliquots of culture were dispensed in duplicate,  
650 per condition. The plates were grown at 37 °C without aeration for 2 hours. An assay  
651 plate was set up containing PlyPy (8  $\mu$ g mL<sup>-1</sup>, 16  $\mu$ g mL<sup>-1</sup>, 32  $\mu$ g mL<sup>-1</sup>), CbpD (0.31  $\mu$ g  
652 mL<sup>-1</sup>, 0.63  $\mu$ g mL<sup>-1</sup>, 1.26  $\mu$ g mL<sup>-1</sup>) or PlyC (1.6 ng mL<sup>-1</sup>, 3.1 ng mL<sup>-1</sup>, 6.2 ng mL<sup>-1</sup>) in a  
653 volume of 100  $\mu$ L. To the assay plate, 100  $\mu$ L of culture was added to each well giving  
654 final concentrations of: PlyPy (4  $\mu$ g mL<sup>-1</sup>, 8  $\mu$ g mL<sup>-1</sup>, 16  $\mu$ g mL<sup>-1</sup>), CbpD (0.16  $\mu$ g mL<sup>-1</sup>,  
655 0.31  $\mu$ g mL<sup>-1</sup>, 0.63  $\mu$ g mL<sup>-1</sup>), or PlyC (0.8 ng mL<sup>-1</sup>, 1.6 ng mL<sup>-1</sup>, 3.1 ng mL<sup>-1</sup>). After  
656 mixing, the absorbance at 600 nm was measured for each well ( $t_0$ ) and the plate was  
657 incubated at 37 °C for 1 h. The absorbance at 600 nm was then measured again ( $t_1$ ).  
658 The percentage difference ( $t_1-t_0$ ) in growth relative to 0 mM of enzyme/antimicrobial, for  
659 each concentration was calculated (i.e. 0 mM PlyPy = 100%).

660 **Extraction and characterization of bacterial glycolipids.** Two liters of bacterial  
661 cells from exponential phase cultures ( $OD_{600}=0.8$ ) were recovered by sedimentation at  
662 10,000 x g for 30 min, and washed with ice-cold PBS 2x. Cells were resuspended in 50  
663 ml PBS, sensitized by incubation with 10 ng mL<sup>-1</sup> PlyC for 1 h at 37 °C and stirred  
664 vigorously with two volumes of CH<sub>3</sub>OH and one volume of CHCl<sub>3</sub> for 30 min at room  
665 temperature. The mixture was divided into 5 mL aliquots in 12 mL glass centrifuge

666 tubes. Insoluble material was removed by centrifugation at 200 g and the organic  
667 extract was transferred to a separatory funnel. The insoluble residue was further  
668 extracted with 1 mL of CHCl<sub>3</sub>/CH<sub>3</sub>OH (2:1) per tube, two times, and the extracts were  
669 combined with the previous organic phase. The organic extract was supplemented with  
670 CHCl<sub>3</sub> and 0.9% NaCl to give a final composition of CHCl<sub>3</sub>/CH<sub>3</sub>OH/0.9% NaCl (3:2:1),  
671 mixed vigorously, and allowed to stand in the cold until phase separation was achieved.  
672 The organic phase was drained off into a second separatory funnel and the organic  
673 layer was washed with 1/3 volume of CHCl<sub>3</sub>/CH<sub>3</sub>OH/0.9% saline (3:48:47), two times.  
674 The aqueous layers were discarded. The organic extract was dried on a vacuum rotary  
675 evaporator, dissolved in a small volume of CHCl<sub>3</sub>/CH<sub>3</sub>OH (2:1) and transferred to a 12.5  
676 x 100 mm screw cap glass tube (with Teflon lined cap). The organic extract was dried  
677 under a stream of nitrogen gas and the glycerolipids were destroyed by deacylation in  
678 0.1 M KOH in toluene/CH<sub>3</sub>OH (1:3) at 0 °C, 60 min. Following deacylation, the reactions  
679 were neutralized with acetic acid, diluted with two volumes of CHCl<sub>3</sub>, 1 volume of  
680 CHCl<sub>3</sub>/CH<sub>3</sub>OH (2:1) and 1/5 volume of 0.9% NaCl/10 mM EDTA. The two-phase mixture  
681 was mixed vigorously and centrifuged to separate the phases. The organic phase was  
682 dried under nitrogen, spotted on a 20 x 20 cm sheet of Silica Gel G and developed in  
683 CHCl<sub>3</sub>/CH<sub>3</sub>OH/H<sub>2</sub>O/NH<sub>4</sub>OH (65:25:4:1). Bacterial lipids were visualized by staining with  
684 iodine vapors and pertinent spots were scraped from the thin layer plate, eluted from the  
685 silica gel with CHCl<sub>3</sub>/CH<sub>3</sub>OH (2:1) and reserved for further analysis.

686 **Mass spectrometry analysis of a phospholipid isolated from 5005ΔgacL.** A  
687 phospholipid accumulated by 5005ΔgacL was purified as described above using  
688 preparative TLC in silica gel. The compound was analyzed by LC-MS using a Q-  
689 exactive mass spectrometer and an Ultimate 3000 ultra high performance liquid  
690 chromatography system (Thermo Fisher Scientific, San Jose, CA) on a Kinetex C18  
691 reversed-phase column (2.6 mm × 100 mm, 2.1 μm, Phenomenex, USA). Two solvents  
692 were used for gradient elution: (A) acetonitrile/water (2:3, v/v), (B)  
693 isopropanol/acetonitrile (9:1, v/v). Both A and B contained 10 mM ammonium formate  
694 and 0.1% formic acid. The column temperature was maintained at 40 °C, and the flow  
695 rate was set to 0.25 ml/min. Mass spectrometric detection was performed by  
696 electrospray ionization in negative ionization mode with source voltage maintained at

697 4.0 kV. The capillary temperature, sheath gas flow and auxiliary gas flow were set at  
698 330 °C, 35 arb and 12 arb, respectively. Full-scan MS spectra (mass range m/z 400 to  
699 1500) were acquired with resolution  $R = 70,000$  and AGC target  $5e5$ . MS/MS  
700 fragmentation was performed using high-energy C-trap dissociation with resolution  $R =$   
701  $35,000$  and AGC target  $1e6$ . The normalized collision energy was set at 30.

702 **Assay for incorporation of GlcNAc into polyisoprenol-linked glycolipid**  
703 **intermediates.** Reaction mixtures for measuring the incorporation of [ $^3\text{H}$ ]GlcNAc into  
704 lipids contained 50 mM Tris, pH 7.4, 0.25 M sucrose, 20 mM  $\text{MgCl}_2$ , 0.5 mM  $\beta$ -  
705 mercaptoethanol, 5  $\mu\text{M}$  UDP-[6- $^3\text{H}$ ]GlcNAc [(100-2000 cpm/pmol) American  
706 Radiolabelled Chemicals] and bacterial membrane suspension (50-250  $\mu\text{g}$  bacterial  
707 membrane protein) in a total volume of 10 to 100  $\mu\text{L}$ . In some experiments, 1 mM ATP  
708 was included, as indicated. Following incubation at 30 °C, the enzymatic reactions were  
709 terminated by the addition of 40 volumes of  $\text{CHCl}_3/\text{CH}_3\text{OH}$  (2:1), thoroughly mixed and  
710 incubated for 5 min at room temperature. Insoluble material was sedimented at 200  $g$   
711 and the organic extract was transferred to a 12x100 mm glass tube. The residue was  
712 re-extracted with 1 ml  $\text{CHCl}_3/\text{CH}_3\text{OH}$  (2:1), two times, and the organic extracts were  
713 combined. The pooled organic extracts were freed of unincorporated radioactivity by  
714 sequential partitioning with 1/5 volume of 0.9% saline/10 mM EDTA and then with 1/3  
715 volume of  $\text{CHCl}_3/\text{CH}_3\text{OH}/0.9\%$  saline (3:48:47) 3 times, discarding the aqueous phase  
716 each time. The washed organic phases were dried under nitrogen and re-dissolved in  
717  $\text{CHCl}_3/\text{CH}_3\text{OH}$  (2:1). A carefully measured aliquot was removed and analyzed for  
718 radioactivity by liquid scintillation spectrometry after drying. The remainder of the  
719 sample was analyzed by thin layer chromatography on Silica Gel G, developed in  
720  $\text{CHCl}_3/\text{CH}_3\text{OH}/\text{H}_2\text{O}/\text{NH}_4\text{OH}$  (65:25:4:1), using a BioScan AR2000  
721 radiochromatoscanner. Incorporation of [ $^3\text{H}$ ]GlcNAc into individual [ $^3\text{H}$ ]GlcNAc-lipids  
722 was calculated using the peak integration values obtained from the BioScan.

723 **Degradation of GlcNAc-lipids by mild acid and mild alkaline treatment.**  
724 Bacterial lipids were subjected to mild acid hydrolysis (50% isopropanol, 0.1 M HCl, 50  
725 °C, 1 h) and mild alkaline methanolysis (0.1 M KOH in toluene/ $\text{CH}_3\text{OH}$  (1:3), 0 °C, 1 h).  
726 Following incubation, the reactions were neutralized with either 1 M Tris or concentrated  
727 acetic acid, diluted with  $\text{CHCl}_3$ ,  $\text{CH}_3\text{OH}$  and 0.9% NaCl to give a final composition of



728 3:2:1, respectively and partitioned as described above. The organic phases were dried  
729 under nitrogen and either quantified for radioactivity or analyzed by thin layer  
730 chromatography and detected by iodine staining.

731 **Phenolysis of GlcNAc-P-Und.** Purified [<sup>3</sup>H]GlcNAc-P-Und was dried under  
732 nitrogen in a 12x100 mm conical screw-cap tube and heated to 68 °C in 0.2 ml 50%  
733 aqueous phenol as described by Murazumi et al. (22). Following phenolysis, 0.1 ml  
734 water was added and the samples were thoroughly mixed. The aqueous and phenolic  
735 layers were separated, dried and analyzed for radioactivity by scintillation spectrometry.

736 **Analytical methods.** Membrane protein concentrations were determined using the  
737 BCA protein assay kit (Pierce Chemical Co.) employing the method of Ruiz et al. (33).  
738 Radioactivity was quantified by liquid scintillation spectrometry on a Packard Tri-Carb  
739 Liquid Scintillation Spectrometer using Econosafe Complete Counting Cocktail  
740 (Research Products International, Inc., Elk Grove IL).

741 **Phylogenetic analysis of GacI homologs.** Sequences of GacI homologs were  
742 retrieved from the non-redundant database using BLAST (58). One thousand  
743 sequences were downloaded and were manually curated to remove sequences with  
744 shorter than 90% sequence length overlap. The redundancy was reduced using CD-HIT  
745 with 0.98 cut off (59). Sequences were manually curated to correct misannotated  
746 translation start codons. The pair-wise similarities were analyzed and visualized using  
747 CLANS with an E-value cut off  $1 e^{-80}$  (40, 60, 61).

748 **Bioinformatics tools.** The TOPCONS (<http://topcons.net/>) (62) web server was  
749 employed to predict trans-membrane regions of GacI, GacJ and GacL. Homology  
750 detection and structure prediction were performed by the HHPred server  
751 (<https://toolkit.tuebingen.mpg.de/#/tools/hhpred>) (63).

752 **Statistical Analysis.** Unless otherwise indicated, statistical analysis was carried out  
753 from at least three independent experiments. Quantitative data was analyzed using the  
754 paired Student's t-test. A P value equal to or less than 0.05 is considered statistically  
755 significant.

756

757 **Supplemental Material**

758 Additional Supplemental Material may be found in the online version of this article at the  
759 publisher's web-site.

760 Table S1

761 Table S2

762 Table S3

763 Table S4

764 Figure S1

765 Figure S2

766 Figure S3

767 Figure S4

768 Figure S5

769 Figure S6

770 Figure S7

771 Supplemental File 1

772

### 773 **ACKNOWLEDGEMENTS**

774 J.S.R., R.J.E., H.Z., A.J.M., N.M.vS., K.V.K. and N.K. designed the experiments. J.S.R.,  
775 R.J.E. and N.K. performed biochemical experiments. P.D., J.C., H.Z. and A.J.M.  
776 performed MS analysis. N.K. constructed plasmids and isolated mutants. J.S.R., R.J.E.,  
777 K.V.K. and N.K. wrote the manuscript.

### 778 **Funding Information**

779 This work was supported by NIH grants R21AI113253 from the National Institute of  
780 Allergy and Infectious Diseases (to N.K.) and R01GM102129 (to Dr. Charles J.  
781 Waechter and J.S.R), 1S10OD021753 to A.J.M. and by the Center of Biomedical  
782 Research Excellence (COBRE) Pilot Grant (to K.V.K, N.K. and J.S.R.) supported by  
783 NIH grant P30GM110787 from the National Institute of General Medical Sciences.

784 N.M.vS. is supported by VIDI grant 91713303 from the Netherlands Organization for  
785 Scientific Research (NWO).

786 Carbohydrate composition analysis at the Complex Carbohydrate Research Center  
787 was supported by the Chemical Sciences, Geosciences and Biosciences Division,  
788 Office of Basic Energy Sciences, U.S. Department of Energy grant (DE-FG02-  
789 93ER20097) to Parastoo Azadi.

790 The funders had no role in study design, data collection and interpretation, or the  
791 decision to submit the work for publication

792

793

794       **REFERENCES**

- 795    1.       **Mistou MY, Sutcliffe IC, van Sorge NM.** 2016. Bacterial glycobiology:  
796        rhamnose-containing cell wall polysaccharides in Gram-positive bacteria. *FEMS*  
797        *Microbiol Rev* **40**:464-479.
- 798    2.       **Carapetis JR, Steer AC, Mulholland EK, Weber M.** 2005. The global burden of  
799        group A streptococcal diseases. *Lancet Infect Dis* **5**:685-694.
- 800    3.       **McCarty M.** 1952. The lysis of group A hemolytic streptococci by extracellular  
801        enzymes of *Streptomyces albus*. II. Nature of the cellular substrate attacked by  
802        the lytic enzymes. *J Exp Med* **96**:569-580.
- 803    4.       **Lancefield RC.** 1933. A Serological Differentiation of Human and Other Groups  
804        of Hemolytic Streptococci. *J Exp Med* **57**:571-595.
- 805    5.       **van Sorge NM, Cole JN, Kuipers K, Henningham A, Aziz RK, Kasirer-Friede**  
806        **A, Lin L, Berends ET, Davies MR, Dougan G, Zhang F, Dahesh S, Shaw L,**  
807        **Gin J, Cunningham M, Merriman JA, Hutter J, Lepenies B, Rooijackers SH,**  
808        **Malley R, Walker MJ, Shattil SJ, Schlievert PM, Choudhury B, Nizet V.** 2014.  
809        The classical lancefield antigen of group a *Streptococcus* is a virulence  
810        determinant with implications for vaccine design. *Cell host & microbe* **15**:729-  
811        740.
- 812    6.       **Coligan JE, Kindt TJ, Krause RM.** 1978. Structure of the streptococcal groups  
813        A, A-variant and C carbohydrates. *Immunochemistry* **15**:755-760.
- 814    7.       **McCarty M.** 1956. Variation in the group-specific carbohydrate of group A  
815        streptococci. II. Studies on the chemical basis for serological specificity of the  
816        carbohydrates. *J Exp Med* **104**:629-643.

- 817 8. **Kabanova A, Margarit I, Berti F, Romano MR, Grandi G, Bensi G, Chiarot E,**  
818 **Proietti D, Swennen E, Cappelletti E, Fontani P, Casini D, Adamo R, Pinto V,**  
819 **Skibinski D, Capo S, Buffi G, Gallotta M, Christ WJ, Campbell AS, Pena J,**  
820 **Seeberger PH, Rappuoli R, Costantino P.** 2010. Evaluation of a Group A  
821 Streptococcus synthetic oligosaccharide as vaccine candidate. *Vaccine* **29**:104-  
822 114.
- 823 9. **Sabharwal H, Michon F, Nelson D, Dong W, Fuchs K, Manjarrez RC, Sarkar**  
824 **A, Uitz C, Viteri-Jackson A, Suarez RS, Blake M, Zabriskie JB.** 2006. Group A  
825 streptococcus (GAS) carbohydrate as an immunogen for protection against GAS  
826 infection. *J Infect Dis* **193**:129-135.
- 827 10. **Soldo B, Lazarevic V, Karamata D.** 2002. tagO is involved in the synthesis of all  
828 anionic cell-wall polymers in *Bacillus subtilis* 168. *Microbiology* **148**:2079-2087.
- 829 11. **Meier-Dieter U, Barr K, Starman R, Hatch L, Rick PD.** 1992. Nucleotide  
830 sequence of the *Escherichia coli* rfe gene involved in the synthesis of  
831 enterobacterial common antigen. Molecular cloning of the rfe-rff gene cluster. *J*  
832 *Biol Chem* **267**:746-753.
- 833 12. **Rush JS, Rick PD, Waechter CJ.** 1997. Polyisoprenyl phosphate specificity of  
834 UDP-GlcNAc:undecaprenyl phosphate N-acetylglucosaminyl 1-P transferase  
835 from *E.coli*. *Glycobiology* **7**:315-322.
- 836 13. **Yamashita Y, Shibata Y, Nakano Y, Tsuda H, Kido N, Ohta M, Koga T.** 1999.  
837 A novel gene required for rhamnose-glucose polysaccharide synthesis in  
838 *Streptococcus mutans*. *J Bacteriol* **181**:6556-6559.

- 839 14. **van der Beek SL, Le Breton Y, Ferenbach AT, Chapman RN, van Aalten DM,**  
840 **Navratilova I, Boons GJ, Mclver KS, van Sorge NM, Dorfmueller HC.** 2015.  
841 GacA is essential for Group A Streptococcus and defines a new class of  
842 monomeric dTDP-4-dehydrorhamnose reductases (RmlD). *Mol Microbiol* **98**:946-  
843 962.
- 844 15. **Shibata Y, Yamashita Y, Ozaki K, Nakano Y, Koga T.** 2002. Expression and  
845 characterization of streptococcal rgp genes required for rhamnan synthesis in  
846 *Escherichia coli*. *Infect Immun* **70**:2891-2898.
- 847 16. **Sumby P, Porcella SF, Madrigal AG, Barbian KD, Virtaneva K, Ricklefs SM,**  
848 **Sturdevant DE, Graham MR, Vuopio-Varkila J, Hoe NP, Musser JM.** 2005.  
849 Evolutionary origin and emergence of a highly successful clone of serotype M1  
850 group a Streptococcus involved multiple horizontal gene transfer events. *J Infect*  
851 *Dis* **192**:771-782.
- 852 17. **Bevenue A, Williams KT.** 1951. Further evidence indicating the specificity of the  
853 orcinol spray reagent for ketoheptoses on paper chromatograms. *Arch Biochem*  
854 *Biophys* **34**:225-227.
- 855 18. **Dittmer JC, Lester RL.** 1964. A Simple, Specific Spray for the Detection of  
856 Phospholipids on Thin-Layer Chromatograms. *Journal of lipid research* **5**:126-  
857 127.
- 858 19. **Danilov LL, Druzhinina TN, Kalinchuk NA, Maltsev SD, Shibaev VN.** 1989.  
859 Polyprenyl phosphates: synthesis and structure-activity relationship for a  
860 biosynthetic system of *Salmonella anatum* O-specific polysaccharide. *Chemistry*  
861 *and physics of lipids* **51**:191-203.

- 862 20. **Wolucka BA, de Hoffmann E, Rush JS, Waechter CJ.** 1996. Determination of  
863 the anomeric configuration of glycosyl esters of nucleoside pyrophosphates and  
864 polyisoprenyl phosphates by fast-atom bombardment tandem mass  
865 spectrometry. *Journal of the American Society for Mass Spectrometry* **7**:541-549.
- 866 21. **Wolucka BA, Rush JS, Waechter CJ, Shibaev VN, de Hoffmann E.** 1998. An  
867 electrospray-ionization tandem mass spectrometry method for determination of  
868 the anomeric configuration of glycosyl 1-phosphate derivatives. *Analytical*  
869 *biochemistry* **255**:244-251.
- 870 22. **Murazumi N, Yamamori S, Araki Y, Ito E.** 1979. Anomeric configuration of N-  
871 acetylglucosaminyl phosphorylundecaprenols formed in *Bacillus cereus*  
872 *Membranes*. *J Biol Chem* **254**:11791-11793.
- 873 23. **Yamamori S, Murazumi N, Araki Y, Ito E.** 1978. Formation and function of N-  
874 acetylglucosamine-linked phosphoryl- and pyrophosphorylundecaprenols in  
875 membranes from *Bacillus cereus*. *J Biol Chem* **253**:6516-6522.
- 876 24. **Dale JL, Cagnazzo J, Phan CQ, Barnes AM, Dunny GM.** 2015. Multiple roles  
877 for *Enterococcus faecalis* glycosyltransferases in biofilm-associated antibiotic  
878 resistance, cell envelope integrity, and conjugative transfer. *Antimicrob Agents*  
879 *Chemother* **59**:4094-4105.
- 880 25. **Reusch VM, Jr., Panos C.** 1977. Synthesis of "group polysaccharide" by  
881 membranes from *Streptococcus pyogenes* and its stabilized L-form. *J Bacteriol*  
882 **129**:1407-1414.

- 883 26. **Lis M, Kuramitsu HK.** 2003. The stress-responsive *dgk* gene from  
884 *Streptococcus mutans* encodes a putative undecaprenol kinase activity. *Infect*  
885 *Immun* **71**:1938-1943.
- 886 27. **Nelson D, Schuch R, Chahales P, Zhu S, Fischetti VA.** 2006. PlyC: a  
887 multimeric bacteriophage lysin. *Proc Natl Acad Sci U S A* **103**:10765-10770.
- 888 28. **Lood R, Raz A, Molina H, Euler CW, Fischetti VA.** 2014. A highly active and  
889 negatively charged *Streptococcus pyogenes* lysin with a rare D-alanyl-L-alanine  
890 endopeptidase activity protects mice against streptococcal bacteremia.  
891 *Antimicrob Agents Chemother* **58**:3073-3084.
- 892 29. **Berg KH, Ohnstad HS, Havarstein LS.** 2012. LytF, a novel competence-  
893 regulated murein hydrolase in the genus *Streptococcus*. *J Bacteriol* **194**:627-635.
- 894 30. **Chu M, Mallozzi MJ, Roxas BP, Bertolo L, Monteiro MA, Agellon A,**  
895 **Viswanathan VK, Vedantam G.** 2016. A *Clostridium difficile* Cell Wall  
896 Glycopolymer Locus Influences Bacterial Shape, Polysaccharide Production and  
897 Virulence. *PLoS Pathog* **12**:e1005946.
- 898 31. **Tsukioka Y, Yamashita Y, Nakano Y, Oho T, Koga T.** 1997. Identification of a  
899 fourth gene involved in dTDP-rhamnose synthesis in *Streptococcus mutans*. *J*  
900 *Bacteriol* **179**:4411-4414.
- 901 32. **Yamashita Y, Tsukioka Y, Tomihisa K, Nakano Y, Koga T.** 1998. Genes  
902 involved in cell wall localization and side chain formation of rhamnose-glucose  
903 polysaccharide in *Streptococcus mutans*. *J Bacteriol* **180**:5803-5807.
- 904 33. **Ruiz N.** 2015. Lipid Flippases for Bacterial Peptidoglycan Biosynthesis. *Lipid*  
905 *insights* **8**:21-31.



- 906 34. **Gomez-Casati DF, Martin M, Busi MV.** 2013. Polysaccharide-synthesizing  
907 glycosyltransferases and carbohydrate binding modules: the case of starch  
908 synthase III. *Protein and peptide letters* **20**:856-863.
- 909 35. **Lairson LL, Henrissat B, Davies GJ, Withers SG.** 2008. Glycosyltransferases:  
910 structures, functions, and mechanisms. *Annu Rev Biochem* **77**:521-555.
- 911 36. **Korres H, Mavris M, Morona R, Manning PA, Verma NK.** 2005. Topological  
912 analysis of GtrA and GtrB proteins encoded by the serotype-converting cassette  
913 of *Shigella flexneri*. *Biochem Biophys Res Commun* **328**:1252-1260.
- 914 37. **Skovierova H, Larrouy-Maumus G, Pham H, Belanova M, Barilone N,**  
915 **Dasgupta A, Mikusova K, Gicquel B, Gilleron M, Brennan PJ, Puzo G, Nigou**  
916 **J, Jackson M.** 2010. Biosynthetic origin of the galactosamine substituent of  
917 Arabinogalactan in *Mycobacterium tuberculosis*. *J Biol Chem* **285**:41348-41355.
- 918 38. **Schaefer K, Matano LM, Qiao Y, Kahne D, Walker S.** 2017. In vitro  
919 reconstitution demonstrates the cell wall ligase activity of LCP proteins. *Nature*  
920 *chemical biology* **13**:396-401.
- 921 39. **Ardiccioni C, Clarke OB, Tomasek D, Issa HA, von Alpen DC, Pond HL,**  
922 **Banerjee S, Rajashankar KR, Liu Q, Guan Z, Li C, Kloss B, Bruni R,**  
923 **Kloppmann E, Rost B, Manzini MC, Shapiro L, Mancina F.** 2016. Structure of  
924 the polyisoprenyl-phosphate glycosyltransferase GtrB and insights into the  
925 mechanism of catalysis. *Nat Commun* **7**:10175.
- 926 40. **Frickey T, Lupas A.** 2004. CLANS: a Java application for visualizing protein  
927 families based on pairwise similarity. *Bioinformatics* **20**:3702-3704.

- 928 41. **Hancock LE, Gilmore MS.** 2002. The capsular polysaccharide of *Enterococcus*  
929 *faecalis* and its relationship to other polysaccharides in the cell wall. *Proc Natl*  
930 *Acad Sci U S A* **99**:1574-1579.
- 931 42. **Michon F, Chalifour R, Feldman R, Wessels M, Kasper DL, Gamian A,**  
932 **Pozsgay V, Jennings HJ.** 1991. The alpha-L-(1----2)-trirhamnopyranoside  
933 epitope on the group-specific polysaccharide of group B streptococci. *Infect*  
934 *Immun* **59**:1690-1696.
- 935 43. **Pritchard DG, Gray BM, Dillon HC, Jr.** 1984. Characterization of the group-  
936 specific polysaccharide of group B *Streptococcus*. *Arch Biochem Biophys*  
937 **235**:385-392.
- 938 44. **Teng F, Singh KV, Bourgogne A, Zeng J, Murray BE.** 2009. Further  
939 characterization of the *epa* gene cluster and *Epa* polysaccharides of  
940 *Enterococcus faecalis*. *Infect Immun* **77**:3759-3767.
- 941 45. **Finn RD, Coggill P, Eberhardt RY, Eddy SR, Mistry J, Mitchell AL, Potter SC,**  
942 **Punta M, Qureshi M, Sangrador-Vegas A, Salazar GA, Tate J, Bateman A.**  
943 2016. The Pfam protein families database: towards a more sustainable future.  
944 *Nucleic Acids Res* **44**:D279-285.
- 945 46. **Linton D, Dorrell N, Hitchen PG, Amber S, Karlyshev AV, Morris HR, Dell A,**  
946 **Valvano MA, Aebi M, Wren BW.** 2005. Functional analysis of the  
947 *Campylobacter jejuni* N-linked protein glycosylation pathway. *Mol Microbiol*  
948 **55**:1695-1703.
- 949 47. **Hoff JS, DeWald M, Moseley SL, Collins CM, Voyich JM.** 2011. *SpyA*, a C3-  
950 like ADP-ribosyltransferase, contributes to virulence in a mouse subcutaneous

- 951 model of *Streptococcus pyogenes* infection. *Infection and immunity* **79**:2404-  
952 2411.
- 953 48. **Caparon MG, Scott JR.** 1991. Genetic manipulation of pathogenic streptococci.  
954 *Methods Enzymol* **204**:556-586.
- 955 49. **Horton RM, Hunt HD, Ho SN, Pullen JK, Pease LR.** 1989. Engineering hybrid  
956 genes without the use of restriction enzymes: gene splicing by overlap extension.  
957 *Gene* **77**:61-68.
- 958 50. **Ruiz N, Wang B, Pentland A, Caparon M.** 1998. Streptolysin O and adherence  
959 synergistically modulate proinflammatory responses of keratinocytes to group A  
960 streptococci. *Mol Microbiol* **27**:337-346.
- 961 51. **Chaffin DO, Beres SB, Yim HH, Rubens CE.** 2000. The serotype of type Ia and  
962 III group B streptococci is determined by the polymerase gene within the  
963 polycistronic capsule operon. *J Bacteriol* **182**:4466-4477.
- 964 52. **Seiler CY, Park JG, Sharma A, Hunter P, Surapaneni P, Sedillo C, Field J,**  
965 **Algar R, Price A, Steel J, Throop A, Fiacco M, LaBaer J.** 2014. DNASU  
966 plasmid and PSI:Biological-Materials repositories: resources to accelerate  
967 biological research. *Nucleic Acids Res* **42**:D1253-1260.
- 968 53. **Nelson D, Loomis L, Fischetti VA.** 2001. Prevention and elimination of upper  
969 respiratory colonization of mice by group A streptococci by using a bacteriophage  
970 lytic enzyme. *Proc Natl Acad Sci U S A* **98**:4107-4112.
- 971 54. **Raz A, Fischetti VA.** 2008. Sortase A localizes to distinct foci on the  
972 *Streptococcus pyogenes* membrane. *Proc Natl Acad Sci U S A* **105**:18549-  
973 18554.

- 974 55. **Bui NK, Eberhardt A, Vollmer D, Kern T, Bougault C, Tomasz A, Simorre JP,**  
975 **Vollmer W.** 2012. Isolation and analysis of cell wall components from  
976 *Streptococcus pneumoniae*. *Analytical biochemistry* **421**:657-666.
- 977 56. **Santander J, Martin T, Loh A, Pohlenz C, Gatlin DM, 3rd, Curtiss R, 3rd.**  
978 2013. Mechanisms of intrinsic resistance to antimicrobial peptides of  
979 *Edwardsiella ictaluri* and its influence on fish gut inflammation and virulence.  
980 *Microbiology* **159**:1471-1486.
- 981 57. **Edgar RJ, Chen J, Kant S, Rechkina E, Rush JS, Forsberg LS, Jaehrig B,**  
982 **Azadi P, Tchesnokova V, Sokurenko EV, Zhu H, Korotkov KV, Pancholi V,**  
983 **Korotkova N.** 2016. SpyB, a Small Heme-Binding Protein, Affects the  
984 Composition of the Cell Wall in *Streptococcus pyogenes*. *Frontiers in cellular and*  
985 *infection microbiology* **6**:126.
- 986 58. **Altschul SF, Gish W, Miller W, Myers EW, Lipman DJ.** 1990. Basic local  
987 alignment search tool. *J Mol Biol* **215**:403-410.
- 988 59. **Huang Y, Niu B, Gao Y, Fu L, Li W.** 2010. CD-HIT Suite: a web server for  
989 clustering and comparing biological sequences. *Bioinformatics* **26**:680-682.
- 990 60. **Alva V, Nam SZ, Soding J, Lupas AN.** 2016. The MPI bioinformatics Toolkit as  
991 an integrative platform for advanced protein sequence and structure analysis.  
992 *Nucleic Acids Res* **44**:W410-415.
- 993 61. **Camacho C, Coulouris G, Avagyan V, Ma N, Papadopoulos J, Bealer K,**  
994 **Madden TL.** 2009. BLAST+: architecture and applications. *BMC bioinformatics*  
995 **10**:421.

- 996 62. **Tsirigos KD, Peters C, Shu N, Kall L, Elofsson A.** 2015. The TOPCONS web  
997 server for consensus prediction of membrane protein topology and signal  
998 peptides. *Nucleic Acids Res* **43**:W401-407.
- 999 63. **Soding J, Biegert A, Lupas AN.** 2005. The HHpred interactive server for protein  
1000 homology detection and structure prediction. *Nucleic Acids Res* **33**:W244-248.
- 1001
- 1002

Tables

1003

1004 Table 1. The major fragments of the precursor ion at  $m/z$  1048

| $m/z$     | Formula                                          | Mass error (ppm) |
|-----------|--------------------------------------------------|------------------|
| 78.95731  | PO <sub>3</sub>                                  | -8.19            |
| 96.96791  | H <sub>2</sub> PO <sub>4</sub>                   | -6.31            |
| 300.04883 | C <sub>8</sub> H <sub>15</sub> O <sub>9</sub> NP | 3.12             |
| 845.65894 | C <sub>58</sub> H <sub>88</sub> ONP              | -1.02            |

1005 Fragment ions originating from the precursor molecular ion of 1048 were subjected to  
1006 MS/MS fragmentation as described in materials and methods. The proposed molecular  
1007 formulae of the product ions are supported by the observed isotope patterns for the  
1008 relevant ions.

1009

1010

1011 Table 2. GlcNAc-lipid synthesis in membrane fractions from various bacterial strains.<sup>a</sup>

1012

| Enzyme Source                   | GlcNAc-P-Und,<br>pmol/mg | GlcNAc-P-P-Und,<br>pmol/mg |
|---------------------------------|--------------------------|----------------------------|
| MGAS5005                        | 259.4±8.2                | 7.8±1.8                    |
| 5005Δ <i>gacI</i>               | Not Detected             | 15.9±2.5                   |
| GBS COH1                        | 62±0.4                   | 5.6±0.8                    |
| GBSΔ <i>gacI</i>                | Not Detected             | 12±2                       |
| <i>E. coli</i> Rosetta<br>(DE3) | Not Detected             | 19.5±0.3                   |
| <i>E. coli</i> :GacI            | 102.8±3.3                | 5.4±0.05                   |
| <i>E. coli</i> :Epal            | 189±3.9                  | 7±1.5                      |

1013

1014 <sup>a</sup>Reaction mixtures contained 50 mM Tris-HCl, pH 7.4, 5 mM 2-mercaptoethanol, 20  
1015 mM MgCl<sub>2</sub>, 1 mM ATP, 5 μM UDP-[<sup>3</sup>H]GlcNAc (486 cpm/pmol) and bacterial membrane  
1016 suspension (50-100 μg membrane protein) in a total volume of 0.01 ml. Following a 10  
1017 minute pre-incubation at 30°C, GlcNAc-lipid synthesis was initiated by the addition of  
1018 UDP-[<sup>3</sup>H]GlcNAc. After 5 min, reactions were processed for GlcNAc-lipid synthesis as  
1019 described in Materials and Methods. The results are representative of at least three  
1020 separate experiments.

1021

1022 Table 3. Kinetic parameters of GlcNAc-lipid synthases in membrane fractions from  
1023 various bacterial strains.<sup>a</sup>

1024

| Enzyme source             | GlcNAc-P-Und |                   | GlcNAc-P-P-Und |                   |
|---------------------------|--------------|-------------------|----------------|-------------------|
|                           | Km, $\mu$ M  | Vmax, pmol/min/mg | Km, $\mu$ M    | Vmax, pmol/min/mg |
| MGAS5005                  | 6.4          | 333               | ND             | ND                |
| 5005 $\Delta$ <i>gacI</i> | ND           | ND                | 19.3           | 2.75              |
| <i>E. coli</i> :GacI      | 18.7         | 54.2              | ND             | ND                |
| <i>E. coli</i> :GacI/J    | 1.1          | 18,500            | ND             | ND                |

1025 <sup>a</sup>Membrane fractions from the indicated bacterial strains were assayed for the formation  
1026 of [<sup>3</sup>H]GlcNAc-lipids in the presence of increasing amounts of Und-P, added as a  
1027 dispersion in 1% CHAPS. Apparent kinetic parameters for Und-P were calculated from  
1028 Michaelis-Menton plots (Fig. S5) using the linear regression algorithm in Sigma Plot ver.  
1029 12 (Systat Software, Inc. San Jose, CA). R squared values were 0.9953 for GAS GacI  
1030 expressed in *E. coli*; 0.983 for GAS GacI co-expressed with GacJ in *E. coli*, 0.9976 for  
1031 GacI in MGAS5005 and 0.931 for GacO in MGAS5005. The results are representative  
1032 of at least two separate experiments. ND = Not Detected.

1033



1034

1035

### Figure legends:

1036

**Figure 1.** Map of *S. pyogenes* genes involved in Group A Carbohydrate (GAC)

1037 biosynthesis and analysis of 5005 $\Delta$ *gacI* and 5005  $\Delta$ *gacL* deletion mutants. (A) GAC

1038 biosynthesis gene cluster. Numbers below represent MGAS5005 gene designations (B)

1039 Representative immunoblot analysis of cell-wall fractions isolated from MGAS5005,

1040 5005 $\Delta$ *gacI*, 5005 $\Delta$ *gacL* and 5005 $\Delta$ *gacL gacL*<sup>+</sup>. Data are representative of biological

1041 triplicates. (C) Binding of N-acetyl glucosamine specific fluorescein-succinylated-WGA

1042 to whole MGAS5005 and 5005 $\Delta$ *gacL* was measured. Data are the average of three

1043 replicates  $\pm$  standard deviation. (D) Rhamnose and GlcNAc mole percentage of total

1044 carbohydrate was determined by GC-MS for cell wall material isolated from MGAS5005

1045 and 5005 $\Delta$ *gacL* following methanolysis as described in Materials and Methods. Data

1046 are the average of four replicates  $\pm$  standard deviation. The asterisk indicate statistically

1047 different values (\*  $p < 0.05$ , \*\*  $p < 0.01$ ) as determined by the Student's t-test. (E and F)

1048 GC-MS chromatograms for glycosyl composition analysis of cell wall isolated

1049 MGAS5005 and 5005 $\Delta$ *gacL*. The deduced schematic structure of the repeating unit of

1050 GAC is shown for each strain. The chromatograms are representative of four separate

1051 analyses performed on two different cell wall preparations.

1052 **Figure 2.** Purification and identification of GlcNAc-phosphate-undecaprenol in

1053 5005 $\Delta$ *gacL*. (A) Thin layer chromatography (TLC) analysis of phospholipids isolated

1054 from MGAS5005 and 5005 $\Delta$ *gacL*. Phospholipids extracted from bacterial strains were

1055 separated by TLC on Silica Gel G in CHCl<sub>3</sub>/CH<sub>3</sub>OH/H<sub>2</sub>O/NH<sub>4</sub>OH (65:25:4:1). Position of

1056 the novel, alkaline-resistant and acid-labile, phospholipid accumulating in 5005 $\Delta$ *gacL* is

1057 indicated by the arrow. The results are representative of three separate experiments.

1058 (B) ESI-MS/MS analysis of the novel phospholipid isolated from 5005 $\Delta$ *gacL*. The  
1059 spectrum is assigned to GlcNAc-phosphate-undecaprenol.

1060 **Figure 3.** Thin layer chromatography of [ $^3$ H]GlcNAc-lipids from *in vitro* incubations of  
1061 GAS mutants and *Bacillus cereus* membranes with UDP- $^3$ H]GlcNAc. Membrane  
1062 fractions from MGAS5005 (panel A), *B. cereus* (Panel B), 5005 $\Delta$ *gacI* (Panel C), or  
1063 5005 $\Delta$ *gacL* (Panel D) were incubated with UDP- $^3$ H]GlcNAc and analyzed for  
1064 [ $^3$ H]GlcNAc lipid synthesis by thin layer chromatography. Reaction mixtures contained  
1065 50 mM Tris-Cl, pH 7.4, 5 mM 2-mercaptoethanol, 20 mM MgCl<sub>2</sub>, 1 mM ATP, 5  $\mu$ M UDP-  
1066 [ $^3$ H]GlcNAc (486 cpm/pmol) and bacterial membrane suspension (100-200  $\mu$ g  
1067 membrane protein) in a total volume of 0.02 ml. Following a 10 minute pre-incubation at  
1068 30°C, GlcNAc-lipid synthesis was initiated by the addition of UDP- $^3$ H]GlcNAc. After 10  
1069 min, reactions were processed for GlcNAc-lipid synthesis as described in Materials and  
1070 Methods. The organic layers were dried, dissolved in a small volume of CHCl<sub>3</sub>/CH<sub>3</sub>OH  
1071 (2:1) and a portion was removed and assayed for radioactivity by liquid scintillation  
1072 spectrometry. The remainder was spotted on 10 x 20 cm plate of silica gel G and  
1073 developed in CHCl<sub>3</sub>/CH<sub>3</sub>OH/NH<sub>4</sub>OH/H<sub>2</sub>O (65:25:1:4). [ $^3$ H]GlcNAc-lipids were detected  
1074 by scanning with an AR2000 Bioscan Radiochromatoscanner. The results are  
1075 representative of three separate experiments.

1076 **Figure 4.** Thin layer chromatography of [ $^3$ H]GlcNAc-lipids from *in vitro* incubations of  
1077 GAS and GBS membranes with UDP- $^3$ H]GlcNAc. Membrane fractions from WT  
1078 MGAS5005 (panel A) or GBS COH1 (Panel B) were incubated with UDP- $^3$ H]GlcNAc  
1079 and analyzed for [ $^3$ H]GlcNAc-lipid synthesis by thin layer chromatography. Reaction  
1080 mixtures were exactly as described in the legend to Figure 3. After 5 min incubation with

1081 UDP- $^3\text{H}$ GlcNAc, reactions were processed for GlcNAc-lipid synthesis as described in  
1082 Materials and Methods. The organic layers were dried, dissolved in a small volume of  
1083  $\text{CHCl}_3/\text{CH}_3\text{OH}$  (2:1) and a portion was removed and assayed for radioactivity by liquid  
1084 scintillation spectrometry. The remainder was spotted on 10 x 20 cm plate of silica gel G  
1085 and developed in  $\text{CHCl}_3/\text{CH}_3\text{OH}/\text{NH}_4\text{OH}/\text{H}_2\text{O}$  (65:25:1:4).  $^3\text{H}$ GlcNAc-lipids were  
1086 detected by scanning with an AR2000 Bioscan Radiochromatoscanner. The results are  
1087 representative of three separate experiments.

1088 **Figure 5.** Effect of ATP on GlcNAc-P-Und synthesis *in vitro* in MGAS5005 membrane  
1089 fractions. GlcNAc-P-Und synthesis in MGAS5005 membranes was assayed after the  
1090 indicated time at 30 °C in the presence (O) or absence (●) of 1 mM ATP. Reaction  
1091 mixtures were identical to those described in Figure 3 except for the presence of ATP.  
1092 Following incubation, incorporation into  $^3\text{H}$ GlcNAc-P-Und was determined as  
1093 described in Materials and Methods. The results are representative of three separate

1094 **Figure 6.** GacI and GacJ exist as a detergent-stable complex in the membrane. GacJ  
1095 and His-tagged GacI were co-expressed in *E. coli* Rosetta DE3 cells and extracted from  
1096 the membrane fraction in 2.5% CHAPS. The proteins were purified using Ni-NTA  
1097 agarose in the presence of 2.5% CHAPS. (A) Fractions collected during Ni-NTA  
1098 purification were analyzed by immunoblot using anti-His antibodies. (B) The eluted  
1099 proteins were analyzed by SDS-PAGE. The results are representative of three separate  
1100 experiments.

1101 **Figure 7.** Analysis of GacO function in MGAS5005. (A) GacO catalyzes the synthesis of  
1102 GlcNAc-P-P-Und in *E. coli* membranes. Reaction mixtures contained 50 mM Tris-HCl,  
1103 pH 7.4, 5 mM 2-mercaptoethanol, 20 mM  $\text{MgCl}_2$ , 0.5 % CHAPS, 20  $\mu\text{M}$  Und-P

1104 (dispersed by ultrasonication in 1 % CHAPS), 5  $\mu$ M UDP-GlcNAc (452 cpm/pmol) and  
1105 *E. coli* membrane fraction from either PR4019, CLM37 or CLM37:GacO strains.  
1106 Following incubation for 10 min at 30 °C, incorporation of [<sup>3</sup>H]GlcNAc into [<sup>3</sup>H]GlcNAc-P-  
1107 P-Und was determined as described in Materials and Methods. Data are the average of  
1108 three replicates  $\pm$  standard deviation.

1109 (B and C) GlcNAc-P-P-Und can function as an acceptor substrate for rhamnosylation to  
1110 form Rhamnosyl-GlcNAc-P-P-Und in 5005 $\Delta$ *gacI* membranes. Incubation conditions  
1111 were as described in the legend to Figure 3. (B) After 35 minutes incubation with UDP-  
1112 [<sup>3</sup>H]GlcNAc, the reactions were analyzed for formation of [<sup>3</sup>H]GlcNAc lipids as described  
1113 in Figure 3. (C) After 5 minutes incubation with UDP-[<sup>3</sup>H]GlcNAc, the reactions were  
1114 incubated with 20  $\mu$ M TDP-Rhamnose for an additional 30 min and analyzed for  
1115 formation of [<sup>3</sup>H]GlcNAc lipids as described in Figure 3. The results are representative  
1116 of three separate experiments.

1117 **Figure 8.** The absence of GacL increases sensitivity to cell wall amidases. Mid-  
1118 exponential phase MGAS5005 and 5005 $\Delta$ *gacL* were grown in the indicated  
1119 concentrations of (A) CbpD, (B) PlyPy, and (C) PlyC. The change in growth is  
1120 represented as a percentage of growth where no amidase was present. Data are the  
1121 average of three replicates  $\pm$  standard deviation. The asterisk indicate statistically  
1122 different values (\*\*  $p < 0.01$ ) as determined by the Student's t-test.

1123 **Figure 9.** Schematic diagram of GAC biosynthesis. GAC is anchored to peptidoglycan  
1124 presumably via phosphodiester bond. GAC biosynthesis is initiated on the inner leaflet  
1125 of the plasma membrane where GacO produces GlcNAc-P-P-Und which serves as a  
1126 membrane-anchored acceptor for polyrhamnose synthesis catalyzed by the GacB,

1127 GacC, GacF and GacG rhamnosyltransferases. Following polymerization polyrhamnose  
1128 is transferred to the outer leaflet of the membrane presumably by the GacD/ GacE ABC  
1129 transporter. Also in the inner leaflet of the membrane, GacI aided by GacJ produces  
1130 GlcNAc-P-Und which then diffuses across the plasma membrane to the outer leaflet  
1131 aided by GacK. Subsequently, GacL transfers GlcNAc to polyrhamnose using GlcNAc-  
1132 P-Und as glycosyl donor. Lastly, protein members of LytR-CpsA-Psr  
1133 phosphotransferase family presumably attach GAC to peptidoglycan. Several details of  
1134 this biosynthetic scheme are still speculative and further research will be required to  
1135 definitively confirm this hypothetical pathway, but the overall organization is consistent  
1136 with other isoprenol-mediated capsular polysaccharide pathways.

1137 **Figure 10.** Sequence relationship of GacI family of proteins. Homology between GacI  
1138 homologs is graphically displayed using CLANS analysis (40). Dots correspond to  
1139 individual protein sequences selected as described in Material and Methods and  
1140 provided as Supplementary File. Selected homologs of *S. pyogenes* are highlighted by  
1141 colored dots.

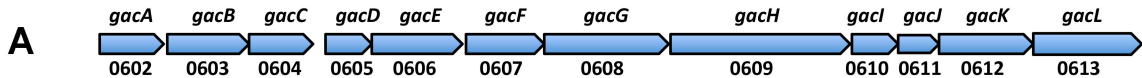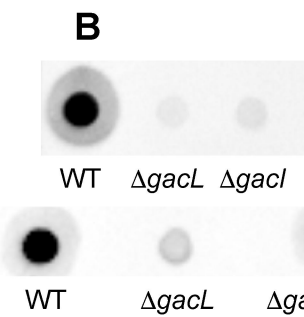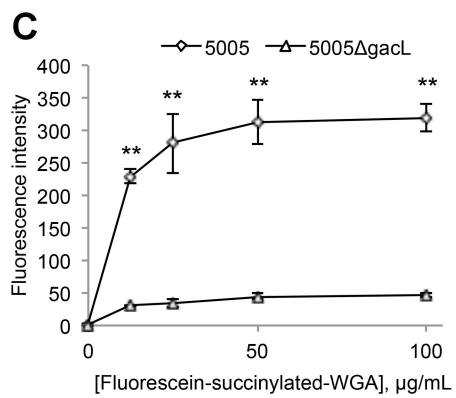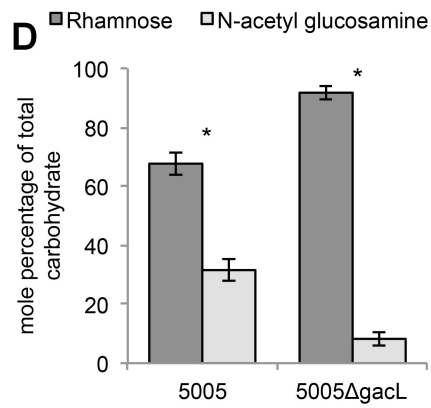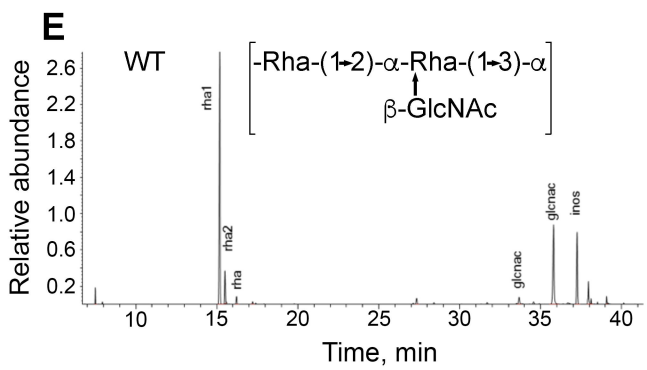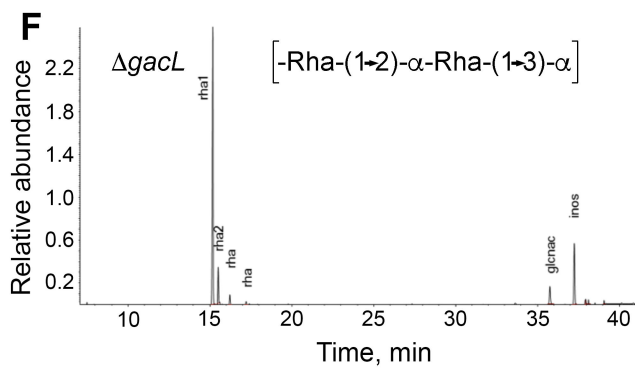

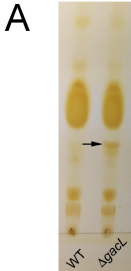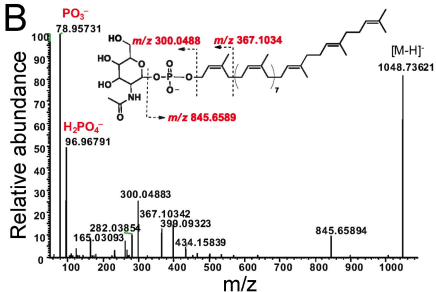

GlcNAc-P-P-Und                      GlcNAc-P-Und

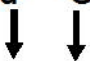

Detector Response

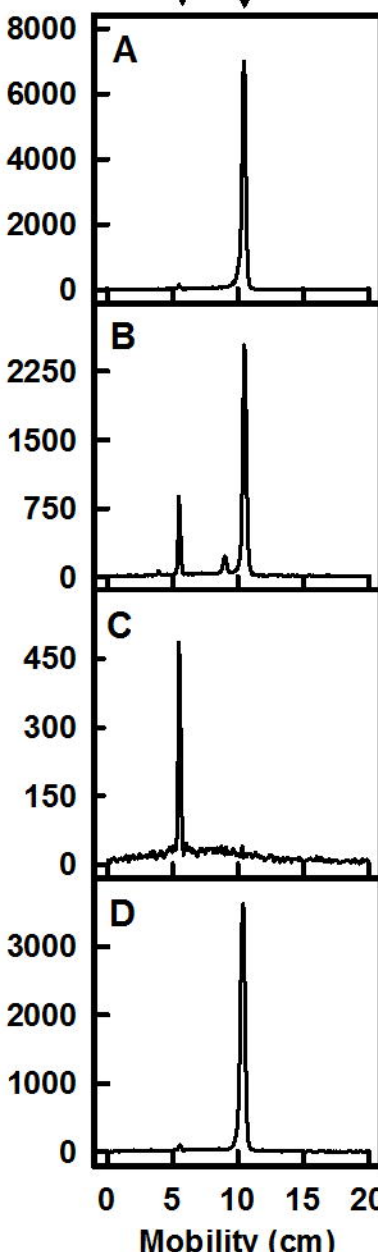



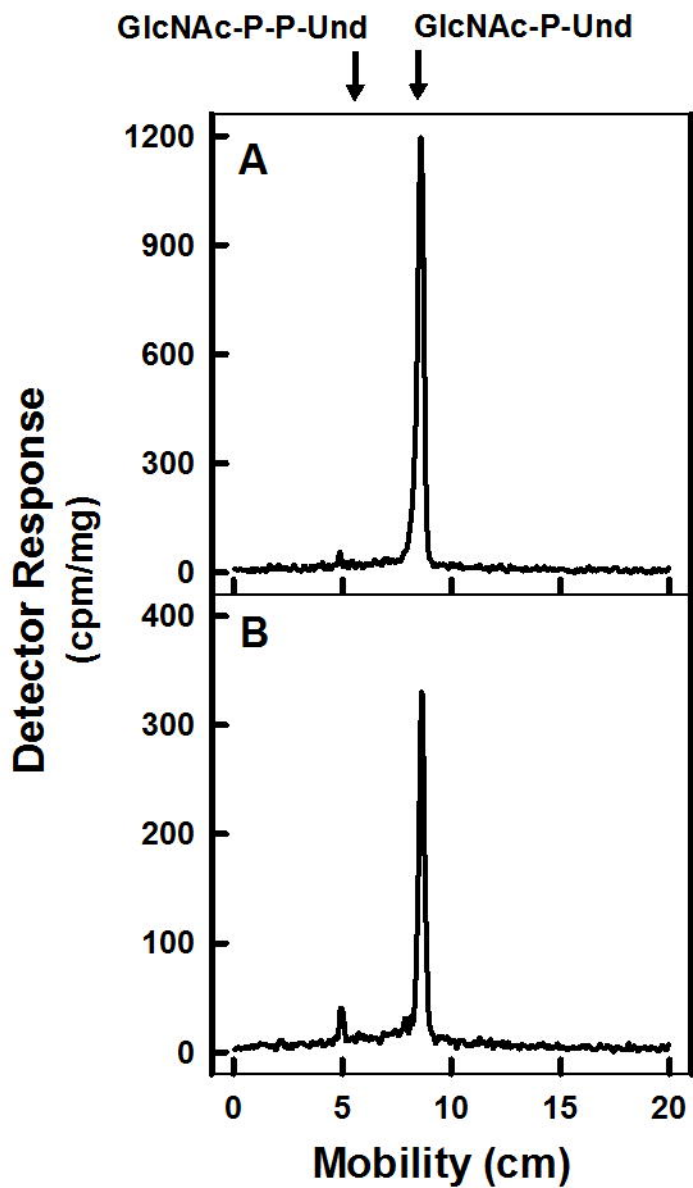

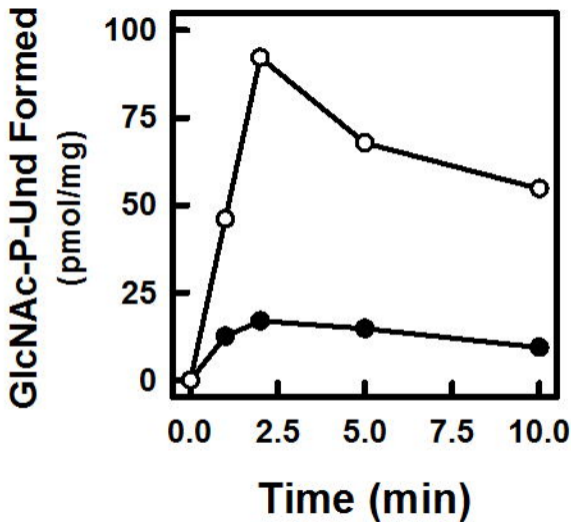

**A**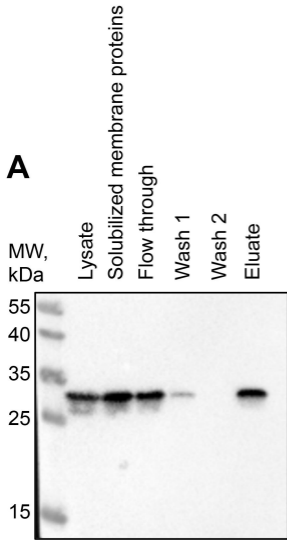**B**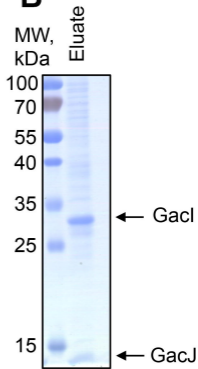

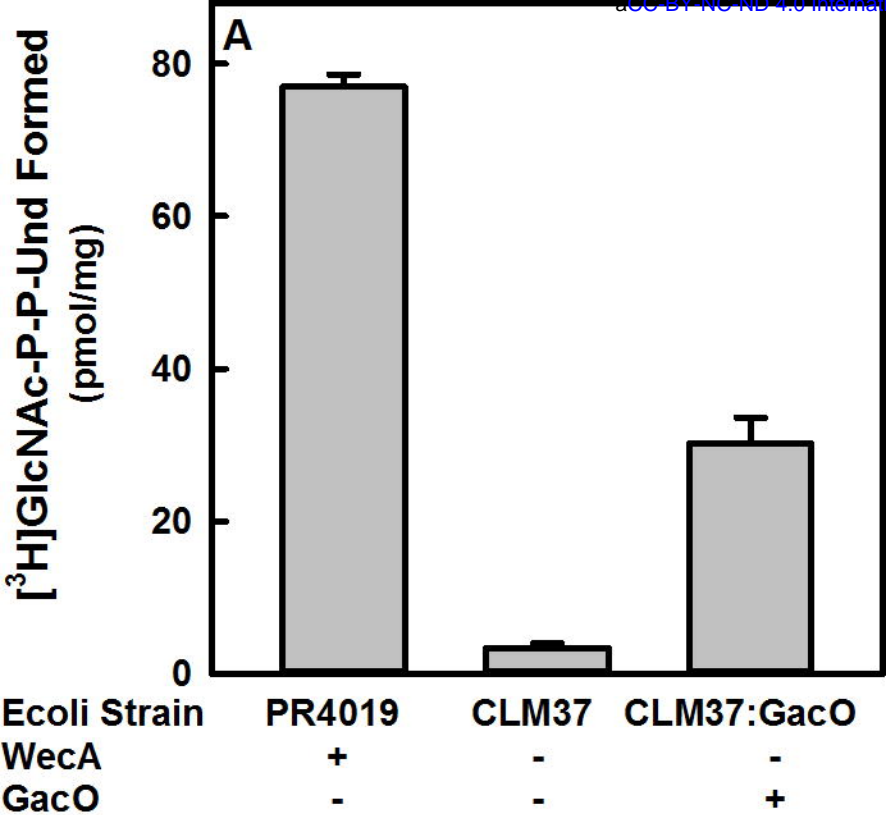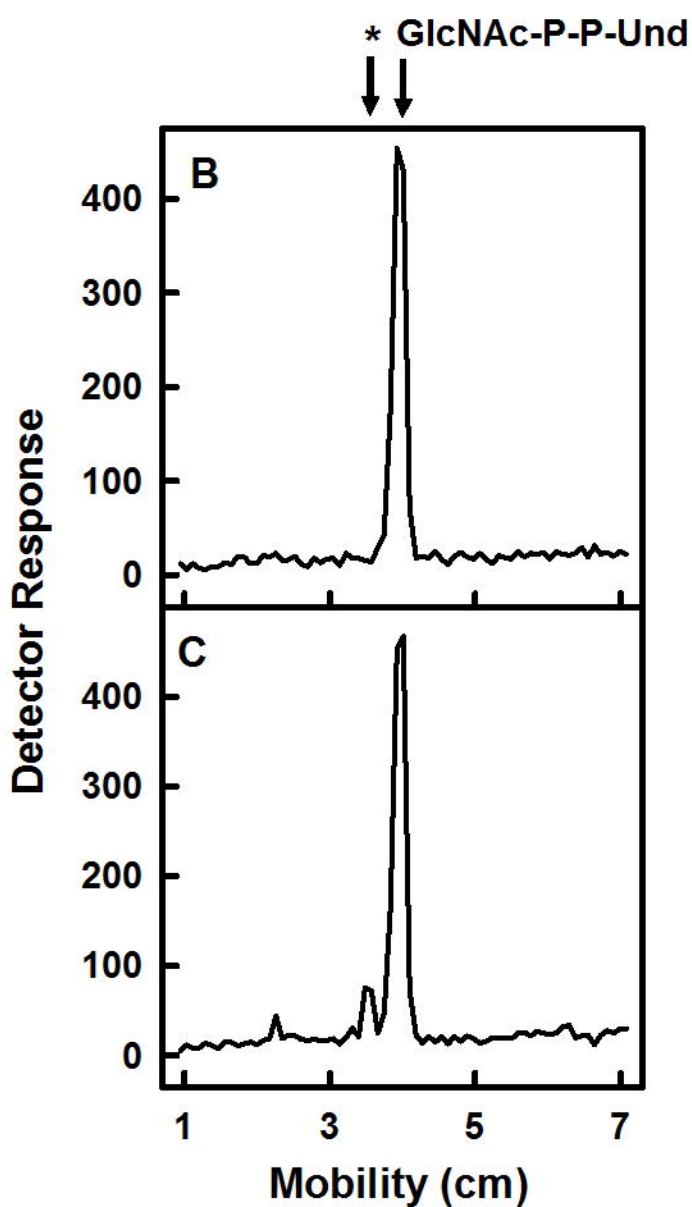

■ 5005 □ 5005ΔGacL

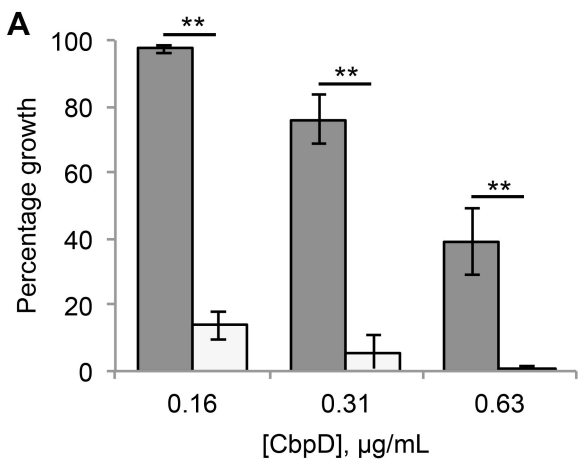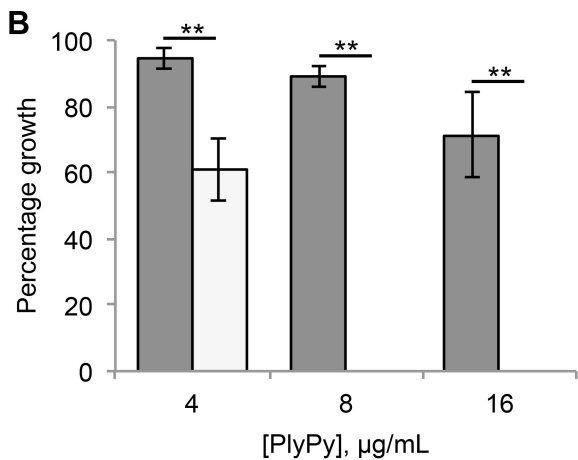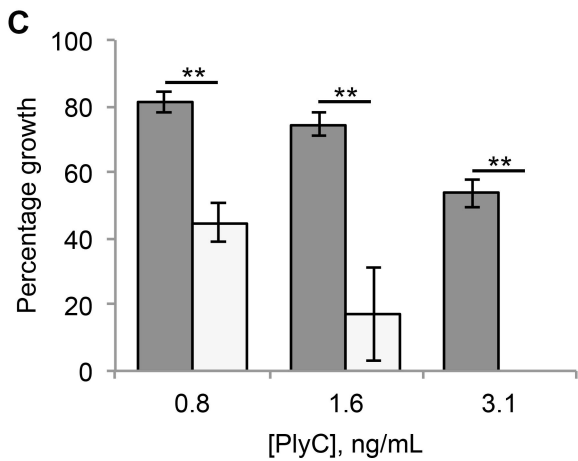

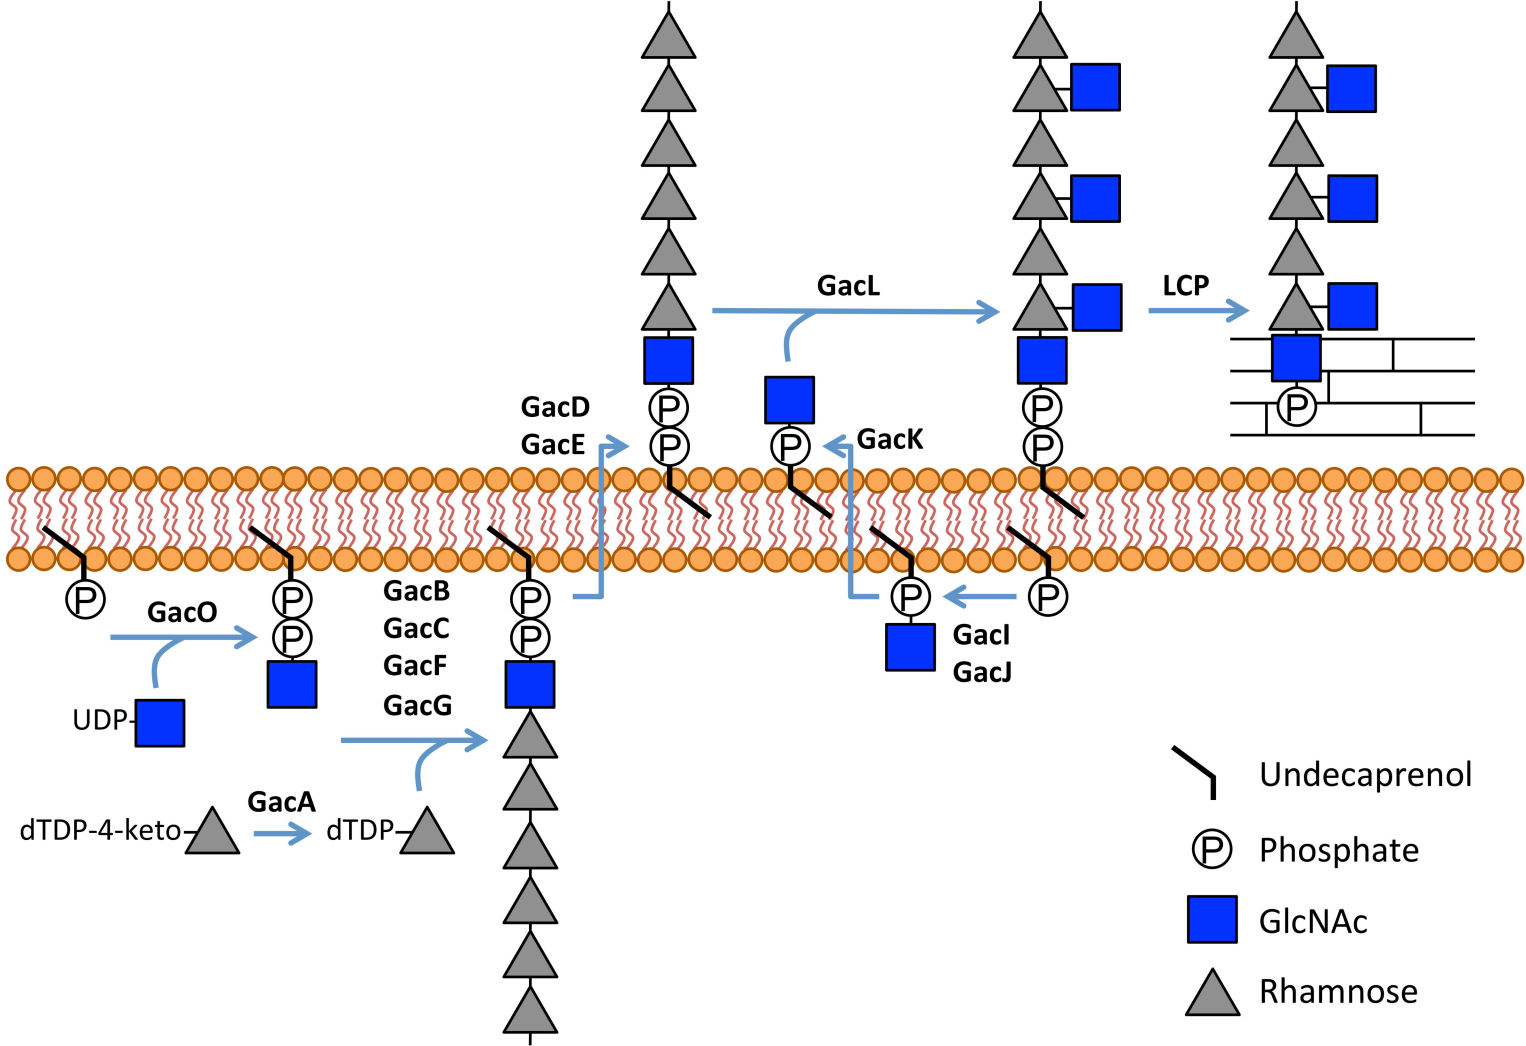

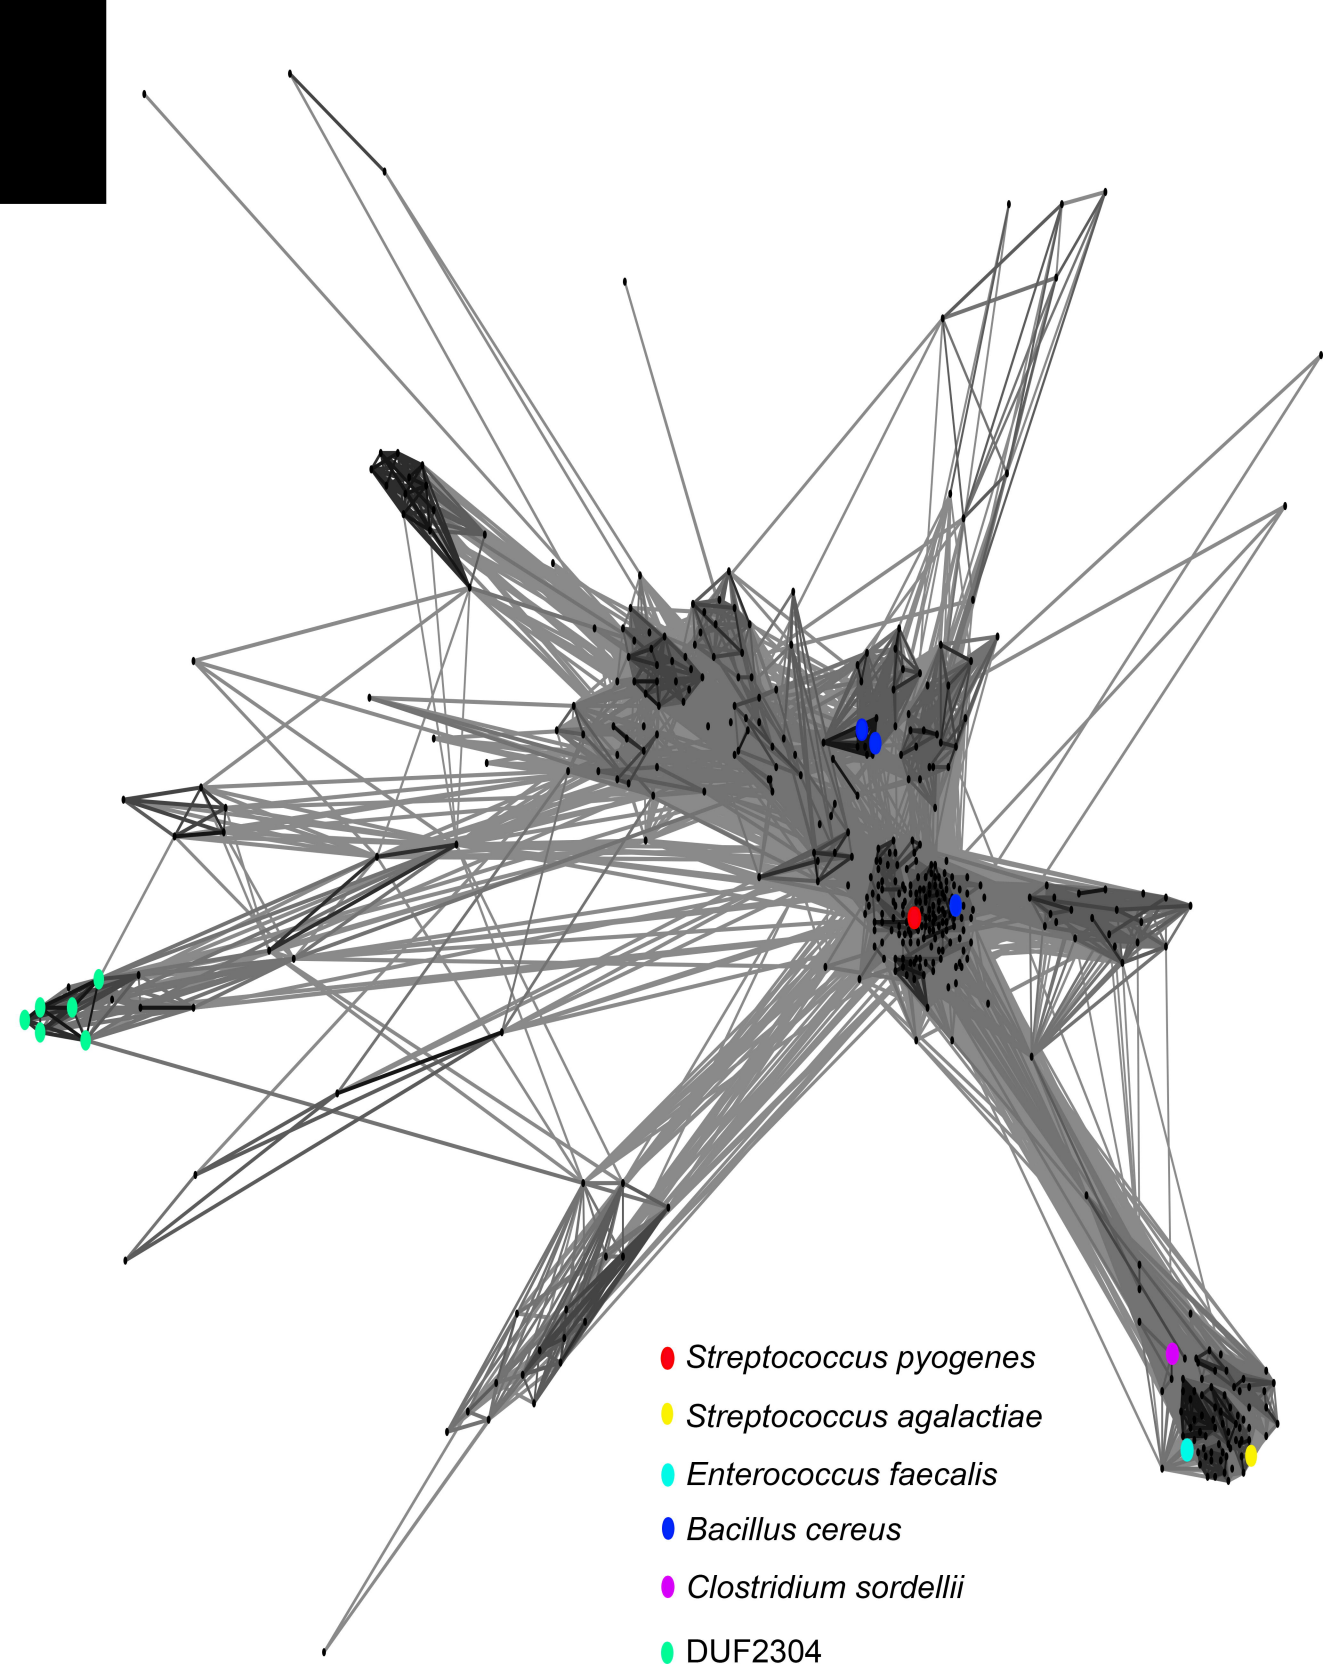

Source: http://www.biorxiv.org/content/10.1101/180810v1.full.pdf
